1  
2  
3  
4  
5  
6  
7  
8  
9  
10  
11  
12  
13  
14  
15  
16  
17  
18  
19  
20  
21

**Tau conformers in FTL D-MAPT undergo liquid-liquid phase separation and perturb the nuclear envelope**

Sang-Gyun Kang<sup>1</sup>, Zhuang Zhuang Han<sup>1,2</sup>, Nathalie Daude<sup>1</sup>, Emily McNamara<sup>1,2</sup>, Serene Wohlgemuth<sup>1</sup>, Jiri G. Safar<sup>3</sup>, Sue-Ann Mok<sup>1, 2</sup> and David Westaway\*<sup>1, 2</sup>

<sup>1</sup>Centre for Prions and Protein Folding Diseases, University of Alberta, Edmonton, AB Canada. <sup>2</sup>Department of Biochemistry, University of Alberta, Edmonton, AB, Canada. <sup>3</sup>Department of Neurology and Pathology, Case Western Reserve University, OH, USA.

\*Correspondence should be addressed to:

D. Westaway PhD, Centre for Prions and Protein Folding Diseases, 204 Brain and Aging Research Building, University of Alberta, Edmonton T6G 2M8, Canada. david.westaway@ualberta.ca

22 **Abstract**

23

24 Recent studies show that a single *MAPT* gene mutation can promote alternative tau misfolding pathways  
25 engendering divergent forms of frontotemporal dementia and that under conditions of molecular crowding, the  
26 repertoire of tau forms can include liquid-liquid phase separation (LLPS). We show here that following pathogenic  
27 seeding, tau condenses on the nuclear envelope (NE) and disrupts nuclear-cytoplasmic transport (NCT).

28 Interestingly, NE fluorescent tau signals and small fluorescent inclusions behaved as demixed liquid droplets in  
29 living cells. Thioflavin S-positive intracellular aggregates were prevalent in tau-derived inclusions with a size bigger  
30 than  $3 \mu\text{m}^2$ , indicating that a threshold of critical mass in the liquid state condensation may drive liquid-solid phase  
31 transitions. Our findings indicate that tau undergoing LLPS is more toxic amongst a spectrum of alternative  
32 conformers; LLPS droplets on the NE that disrupt NCT serve to trigger cell death and can act as nurseries for  
33 fibrillar structures abundantly detected in end-stage disease.

34

35 **Keywords:** tauopathy, focal tau pathology, liquid-solid phase transition, nuclear cytoplasmic transport, transgenic  
36 mouse

37

38 **Introduction**

39

40 Intracellular inclusions of microtubule-associated protein tau are the pathological hallmark of tauopathies including  
41 frontotemporal lobar degenerations (FTLDs) and Alzheimer's disease (AD) (Gotz, Halliday, & Nisbet, 2019; T.  
42 Guo, Noble, & Hanger, 2017). Tau is encoded by the *MAPT* gene and expressed mainly in neurons as six different  
43 isoforms, depending on neuronal types and maturation stages (T. Guo et al., 2017; Wang & Mandelkow, 2016). Tau  
44 stabilizes and maintains the architecture of microtubules and axonal integrity of neurons, in which tau is in a  
45 dynamic equilibrium between a microtubule-bound and cytoplasmic free state (T. Guo et al., 2017; X. Zhang et al.,  
46 2017). The conformational change of monomeric soluble tau into other conformers that include  
47 hyperphosphorylated oligomers, paired helical filaments (PHFs) and fibrillized tau is thought to contribute to  
48 neuronal toxicity and cell death (Gotz et al., 2019; T. Guo et al., 2017; Wang & Mandelkow, 2016). We recently  
49 reported that even the same germline mutation, *MAPT*-P301L, generates distinct tau conformers as appraised by  
50 conformation-dependent immunoassay (CDIs) and conformational stability assays (CSAs) (Daude et al., 2020). The  
51 diverse and evolving repertoire of tau conformers that includes four CSA profiles in mice (CSA Types 1-4) was  
52 postulated as the origin of neuropathological and biochemical heterogeneity of FTLD with tau immunoreactive  
53 inclusions (FTLD-tau) (Daude et al., 2020; Gotz et al., 2019). Moreover, in frontotemporal dementia (FTD), a  
54 neurological diagnosis that is associated with the neuropathological diagnosis of FTLD, CSA Types were correlated  
55 with clinical disease variants. However, this being said, the cellular events that draw a line from protein  
56 conformation to neurological dysfunction are not well understood.

57

58 Nuclear localization of tau has been observed and suggested to facilitate genome surveillance under conditions of  
59 cellular stresses (Bukar Maina, Al-Hilaly, & Serpell, 2016). In neurodegenerative disorders including FTD,  
60 Huntington's disease, Parkinson disease and amyotrophic lateral sclerosis (ALS), disruption of nuclear-cytoplasmic  
61 transport (NCT) has been proposed as a toxic mechanism mediated by abnormally aggregated proteins (Grima et al.,  
62 2017; Jiang et al., 2016; Jovicic et al., 2015; Woerner et al., 2016; K. Zhang et al., 2018; K. Zhang et al., 2015).

63 Nuclear pore complexes (NPCs), which are one of the largest macromolecular assemblies found in eukaryotic cells,  
64 reside in the nuclear envelope (NE) and mediate NCT of various nuclear proteins and RNAs (Clarke & Zhang, 2008;

65 Guttinger, Laurell, & Kutay, 2009; Timney et al., 2016). These cellular components, as well as lamin proteins that  
66 contribute to the lamina of the NE, may have an intrinsic jeopardy to accumulating damage in chronological aging  
67 as they have remarkably low rates of turnover (Toyama et al., 2013). For tau, it is accepted that alterations in the  
68 physiological properties resulting from post-translational modifications, conformational changes and/or pathogenic  
69 mutations, can lead to mis-localization and formation of inclusions in neuronal cell bodies (Gotz et al., 2019; T. Guo  
70 et al., 2017). More recently, there has been a focus upon whether tau inclusions cause an impairment of NCT,  
71 following from sequestration of nucleoporins (NUPs) (Eftekharzadeh et al., 2018) and nuclear deformation  
72 (Paonessa et al., 2019) (both *in vitro* and *in vivo*), incurring toxic consequences. It is possible that these newly  
73 documented changes in tau and nuclear proteins may intersect with discoveries in a third axis of work.

74

75 Membraneless organelles (MLOs) formed by a phase separation process (see below) have been highlighted as active  
76 bioreactors regulating cell signaling, protein synthesis and various biological reactions against environmental  
77 stresses (Alberti, Gladfelter, & Mittag, 2019; Brangwynne, 2013; Ryan & Fawzi, 2019; Shin & Brangwynne, 2017).  
78 Rapid and reversible phase transition of MLOs simultaneously presents a fascinating chemical change and opens up  
79 a new frontier in pathogenesis, relating to the cellular and molecular impacts of these assemblies (Brangwynne,  
80 2013; Ryan & Fawzi, 2019). Multivalent polymers, especially proteins containing low complexity domains (LCDs)  
81 and RNA molecules, bind to each other and condense as liquid droplets, a process termed liquid-liquid phase  
82 separation (LLPS) that has been thought to regulate MLOs (Alberti et al., 2019; Ryan & Fawzi, 2019; Shin &  
83 Brangwynne, 2017). MLOs need to be assembled as functional condensed droplets and be disassembled by quality  
84 control processes within a confined biological time-scale if irreversible conformational changes are to be avoided  
85 (Nedelsky & Taylor, 2019; Patel et al., 2015). In ALS/FTD, loss-of-function mutations in LCDs and/or RNA  
86 recognition motifs (RRMs) are responsible for neurotoxicity by disrupting the dynamics of MLOs (Ryan & Fawzi,  
87 2019). Pathogenic mutations in DNA-binding protein 43 (TDP43), heterogeneous nuclear ribonucleoprotein A1  
88 (hnRNPA1) and fused in sarcoma (FUS) altered biophysical properties of MLOs from reversible metastable liquid  
89 condensates to irreversible persistent fibrous aggregates (Kim et al., 2013; Mann et al., 2019; Murakami et al., 2015;  
90 Patel et al., 2015). Toxic dipeptide repeat (DPRs) proteins are produced from a hexanucleotide repeat expansion in  
91 C9ORF72, which is the most common cause of ALS/FTD (Jovicic et al., 2015; K. Zhang et al., 2015) and the

*LLPS of tau disrupts NPC*

92 interactions of DPRs with proteins harboring LCDs or RRM domains disturb multiple MLOs such as nucleoli, NPCs and  
93 stress granules (SGs) (Lee et al., 2016). For tau, recent studies have shown that this intrinsically disordered protein,  
94 although lacking predicted LCDs and RRM domains, nonetheless has some propensity to undergo LLPS (Ambadipudi,  
95 Biernat, Riedel, Mandelkow, & Zweckstetter, 2017; Boyko, Qi, Chen, Surewicz, & Surewicz, 2019; Singh, Xu,  
96 Boyko, Surewicz, & Surewicz, 2020; Vega, Umstead, & Kanaan, 2019; Wegmann et al., 2018; X. Zhang et al.,  
97 2017).

98

99 In studies here we now demonstrate that liquid phase condensation of tau occurs in living cells and that this effect  
100 derives from gain-of-function properties of FTL/MAPT mutations in the repeat domain (i.e., P301L or  
101 P301L+V337M). In contrast to the loss-of-function mutations in TDP43, hnRNPA1, FUS and C9ORF72 (DPRs)  
102 that downgrade a physiological, protective form of LLPS (Kim et al., 2013; Lee et al., 2016; Mann et al., 2019;  
103 Murakami et al., 2015; Patel et al., 2015), disease-causing mutations in tau facilitate LLPS assemblies that sequester  
104 NUPs from NPCs and hence are toxic by virtue of impeding vital NCT. Because of these toxic cellular effects,  
105 LLPS tau can be seen as an important entity within a spectrum of tau conformers defined by chemical denaturation  
106 (Daude et al., 2020).

107

108 **Results**

109

110 *Nuclear architecture in FTLD-tau*

111 We have previously reported a slow model of a primary tauopathy, FTLD-MAPT; aged mice from the TgTau<sup>P301L</sup>  
112 line can show heterogeneity in histopathological presentations and types of trypsin-resistant cores of tau, phenomena  
113 which are likely related to the variations in clinical phenotypes seen in FTLD-MAPT-P301L patients (Borrego-Ecija  
114 et al., 2017; Daude et al., 2020; Eskandari-Sedighi et al., 2017; Murakami et al., 2006). To investigate tau-associated  
115 nuclear distortion, nuclear lamina in post-mortem cerebral cortex of both FTLD-MAPT-P301L patients and  
116 TgTau<sup>P301L</sup> mice were probed by lamin B1 immunostaining. Our resources included brain tissue from ten Iberian  
117 FTLD-MAPT-P301L patients (Borrego-Ecija et al., 2017), that likely derive from a common ancestor (Palencia-  
118 Madrid et al., 2019). These P301L cases, characterized previously for tau pathology and a confirmed absence of  
119 confounding proteinopathies (Borrego-Ecija et al., 2017; Daude et al., 2020), were augmented by a number of  
120 controls including AD cases, FTD with progranulin mutations, ALS cases and non-demented controls. Although  
121 analyses by others have remarked upon nuclear clefts as a feature of FTLD-MAPT (Paonessa et al., 2019), when  
122 examining the nuclei of dentate gyrus (DG) neurons this finding also applied to other clinical entities, being  
123 abundant within three ALS cases, two progranulin mutation carriers and in one non-demented control (**Table 1** and  
124 **Figure 1**). While there was a trend for lower ages in the P301L group, this did not reach significance and this  
125 alteration was thus considered to be age-related and not disease-related. Thus, along with other analyses (Molina-  
126 Porcel et al., 2019), the hypothesis for a relationship between nuclear clefts and the specific pathogenic processes of  
127 FTLD-MAPT was not supported, prompting consideration of other nuclear alterations caused by the presence of  
128 misfolded tau isoforms. Using anti-lamin B1 antibodies to stain the nuclear lamina, we assessed potential  
129 distinctions between FTLD-MAPT-P301L cases versus control samples (**Figure 1a to 1d**). Discounting occasional  
130 nuclear clefts (**Table 1, Figure 1b and 1e**) also present in other diseases, several distinctions were noted, which  
131 included: variations in staining intensity on the margins of normally shaped nuclei (**Figure 1d**), nuclei with angled  
132 margins and non-uniform lamin B staining (**Figure 1f**) and cells with granular and apparently spherical  
133 immunostained structures in the cytoplasm (**Figure 1g and 1h**). Considering the mouse FTLD-MAPT-P301L model,  
134 nuclear clefts were present in both aged TgTau<sup>P301L</sup> and non-Tg mice (**Figure 1i to 1l**), but we observed nuclei with

135 angled margins and non-uniform lamin B1 staining in the cortex and DG for Tg mice as well as incomplete staining  
136 of nuclear lamina (**Figure 1m to 1p**). Juxtannuclear tau signals and punctate cytoplasmic signals were present in both  
137 FTLN-MAPT-P301L cases and TgTau<sup>P301L</sup> mice, along with some nuclear margins decorated by interspersed  
138 circular areas of tau staining (**Figure 1q**). Indeed, double-staining experiments yielded an apparently reciprocal  
139 pattern of staining where tau signals along the nuclear margins were matched by dimmed areas of lamin B staining  
140 (**Figure 1q**). These data suggested an exchange or swapping phenomenon affecting proteins on or adjacent to the  
141 nuclear envelope.

142

### 143 *Tau inclusions accumulate on the nuclear envelope*

144 To further investigate tau aggregation and its putative cytotoxicity, brain homogenates derived from TgTau<sup>P301L</sup>  
145 mice exhibiting pathological signs of neurological disease were seeded into two distinct tau reporter cells  
146 (Eskandari-Sedighi et al., 2017; Kaufman et al., 2016; Sanders et al., 2014). Firstly, we used human embryonic  
147 kidney 293 cells (HEK293) expressing yellow fluorescent protein (YFP) fused the four-repeat domain (4R) of  
148 human tau with aggregation prone mutations (P301L/V337M), 4RD-YFP reporter cells (4RD-YFP P301L/V377M)  
149 (Sanders et al., 2014). Secondly, we also used HEK293 cells expressing a doxycycline-inducible green fluorescent  
150 protein (GFP) fused full-length human tau (0N4R) with aggregation prone mutation (P301L), GFP-0N4R reporter  
151 cells (Dox:GFP-0N4R P301L). The GFP-0N4R form of tau (a 66 kDa species) was observed in cytoplasm as  
152 expected, while the 4RD-YFP tau (a 45 kDa species) yielded signals spread throughout the cell body to include the  
153 nucleus (**Figure 2a and 2b**); the latter may be due to passive macromolecular diffusion through NPCs which  
154 decreases beyond a 30-60 kDa size threshold (Timney et al., 2016).

155 Confirming and extending previous analyses (Daude et al., 2020), fluorescent signatures included large tau  
156 inclusions in cytoplasm (amorphous, TI-1), discontinuous perimeter signals along with the nuclear edges (nuclear  
157 envelope, NE, TI-2), small bead shapes with various sizes most likely seen in nucleus (speckles, TI-3) and  
158 cytoplasmic fibril-like strip forms (threads, TI-4) (**Figure 2a and 2b, Supplementary Figure 1**). Seeded tau reporter  
159 cells occasionally appeared with a complex of mixed morphologies (TI-1 and TI-2, or TI-2 and TI-3), or as  
160 multinucleated giant cells (MNGCs), characterized by bright NE with increased cytoplasmic tau signals or various  
161 threads shaped inclusions (**Figure 2a and 2b**). Following these baseline descriptions of fixed cells, live cell imaging

162 was then undertaken to investigate dynamic aspects of tau inclusion formation. These analyses revealed cell-to-cell  
163 spread and, also, mitosis of fluorescence-positive seeded cells often resulted in both daughter cells being positive for  
164 tau inclusions (**Supplementary Figure 2a** and **Supplementary Movie 1**). We noted that tau inclusions within cell  
165 debris were adsorbed by adjacent cells and fused with others, which produced larger inclusions (**Figure 2c** and  
166 **Supplementary Movie 2, Supplementary Figure 2b** and **Supplementary Movie 3**) as being consistent with the  
167 previous report that dynamic structure of tau aggregates undergo “fusion” and “fission” in stable cell lines  
168 expressing full-length human tau T40 (2N4R) carrying the P301L mutation with a GFP tag (T40/P301L-GFP) (J. L.  
169 Guo et al., 2016). Moreover, live cell imaging analyses indicated that MNGCs resulted from a failure in cell division  
170 (**Figure 2d** and **Supplementary Movie 4**); as reported by others (Caneus et al., 2018), mitotic abnormalities,  
171 chromosome mis-segregation, and aneuploidy were observed in transgenic mice expressing the human P301S  
172 FTLD-MAPT mutation.

173 Among the four fluorescent morphologies observed in transduced cells, NE tau inclusions (TI-2) were prominent  
174 when seeding reporter cells with brain extracts assigned with a CSA profile called Type 2; this conformational  
175 profile for aggregated tau was found in TgTau<sup>P301L</sup> mice or in frontal cortex extracts from FTLD-MAPT-P301L  
176 patients presenting as a behavioral variant of FTD with memory impairment (bvFTD\*) (Daude et al., 2020). To  
177 allow more detailed biochemical and cell biological investigations of these NE tau inclusions, we seeded 4RD-YFP  
178 reporter cells (P301L/V377M) with a CSA Type 2 brain homogenate (Daude et al., 2020) and established a single  
179 cell clone by limiting dilution, designated ES1. Interestingly, these ES1 clonal cells exhibited all the aforementioned  
180 tau inclusion morphologies described in **Figure 2a**, as well as occasional mixed morphological phenotypes and  
181 multinucleated cells (**Figure 3a**). To exclude the occurrence of non-clonal cell isolates surviving the limiting  
182 dilution procedure, we re-cloned the ES1 cells by another round of limiting dilutions. Six new single cell clones  
183 were obtained, but these were still not obviously distinguishable from the parental ES1 cells. Thus, the single cell  
184 clones exhibited the same heterogeneous inclusion phenotypes (**Supplementary Figure 3a**) and the same size of  
185 protease-resistant core following limited proteolytic digestion (**Supplementary Figure 3b to 3e**), suggesting this  
186 grouping of phenotypic properties reflect an intrinsic property or capability of the misfolded tau species within this  
187 cell clone.

188



189 *Cell cycle effects, nuclear inclusions and cytotoxicity*

190 Quite remarkably, closer analysis of non-multinuclear ES1 cells by live cell imaging analysis revealed dynamic  
191 interchange between the morphologies; NE tau inclusions (TI-2) underwent morphological changes to TI-3  
192 (speckles) and then to TI-1 (amorphous) inclusions (**Supplementary Figure 4** and **Supplementary Movie 5**,  
193 **Figure 3b** and **Supplementary Movie 6**). These data led us to infer that the appearance of ES1 tau inclusions at the  
194 NE and cell divisions are mechanistically intertwined in HEK-derived reporter cells, thus contributing to three  
195 fluorescent morphologies noted previously (Daude et al., 2020). In the case of ES1 clonal cells, tau inclusions  
196 continuously recruit to the NE during the mitotic interphase, appearing as the TI-2 morphology. Loss of NE tau  
197 inclusion signals during the cell cycle is consistent with disassembly of the NE and its components as a defining  
198 event during metaphase to anaphase transition; this loss of NE inclusion signals was marked by a corresponding  
199 increase in TI-3 morphology. During telophase, tau inclusions excluded from NE reassembly fuse together and form  
200 large amorphous masses as TI-1 morphology. These processes whereby tau accumulates on the NE and undergoes  
201 morphological changes repeat, until a given cell reaches the end of its life span (**Figure 3c**, **Supplementary Figure**  
202 **4** and **Supplementary Movie 5**). To determine whether mitotic events are contributing to morphological  
203 heterogeneity of tau fluorescent signals, ES1 cells were treated with a cell-cycle arresting reagent, Cyclin-dependent  
204 kinase (CDK) 1/2 inhibitor III; this is a cell-permeable inhibitor that targets both CDK1/cyclin B and CDK2/cyclin  
205 A and is reported to arrest cells at the G2/M boundary (Jorda et al., 2018). CDK1/2 inhibitor III applied at 10 nM  
206 concentration was sufficient to inhibit the proliferation of ES1 cells without overt cytotoxic effects (**Figure 3d**), and  
207 concomitantly this same concentration increased the number of cells showing TI-2 morphology ( $42.6 \pm 2.3\%$   
208 compared to control cells  $28.7 \pm 2.6\%$ ; **Figure 3e**), supporting the hypothesis that the tau conformer in the ES1  
209 clonal line has the propensity to bind to NE and undergoes morphological changes as an inevitable consequence of  
210 NE disassembly and reassembly.

211 We then explored whether the NE tau inclusions were associated with cytotoxic effects. Sedimentation analysis  
212 revealed that ES1 cells contained mostly insoluble forms of tau, whereas non-seeded reporter cells (4RD-YFP  
213 P301L/V377M) had entirely soluble tau (**Figure 4a** and **4b**). While the heterogeneous morphology of NE tau  
214 inclusions in ES1 cells persisted for more than 200 days in culture post sub-cloning, the ES1 cells did however show  
215 an increase in cleaved lamin B1 (**Figure 4a** and **4b**), a decrease in the cell proliferation (**Figure 4c**) and an increase

216 in lactate dehydrogenase (LDH) activities in the conditioned media compared to the non-seeded reporter cells  
217 (**Figure 4d**). These data suggest that an elevated level of cell death might be linked to the presence of NE tau  
218 inclusions. Levels of cleaved caspase 3 (Cas-3), Bax dimers and fragmented lamin B1, which are apoptotic cell  
219 death markers (Vince et al., 2018; D. Zhang, Beresford, Greenberg, & Lieberman, 2001), were higher in ES1 than in  
220 un-transduced reporter cells (**Figure 4e and 4f, Supplementary Figure 5**). Interestingly, time-lapse imaging of live  
221 cells revealed apoptosis-like death of multinucleated cells with NE tau inclusions, as characterized by nuclear  
222 collapse and formation of apoptotic bodies (**Figure 4g and Supplementary Movie 7**).

223

#### 224 *Cytotoxicity potential of NE-associated tau inclusions*

225 Building on the above, we considered whether NE accumulation of tau inclusions might interfere with the  
226 functionality of NPCs, and thereby cause disrupted NCT, noting that NPCs reside in the NE and mediate  
227 bidirectional NCT of molecules essential for cell proliferation and survival (Beck & Hurt, 2017; Strambio-De-  
228 Castillia, Niepel, & Rout, 2010). It is reported that under certain conditions of tauopathy, tau binds to NUPs  
229 (Eftekhazadeh et al., 2018), which are the main components of the NPCs and embedded in the central lumen of  
230 NPCs. We used immunocytochemistry with the anti-NUPs mAb NPC414 (detecting conserved Phe and Gly-rich  
231 repeats on NUPs 62, 90 and 152) and an anti-NUP98 pAb to confirm a mis-localization of NUPs in the presence of  
232 tau inclusions (**Figure 5a and Supplementary Figure 6**). Nuclear deformation and/or bubble-like protrusions on the  
233 nuclei were evident in ES1 cells with a large mass of tau inclusions (**Figure 5b**), overlapping some observations in a  
234 previous report that pathogenic mutations in tau can cause microtubule-mediated deformation of nuclei, as seen in  
235 post mortem analyses of tissues (Paonessa et al., 2019).

236 The NE itself consists of the inner and outer nuclear membranes, which are separated by the perinuclear space  
237 (Guttinger et al., 2009; Suntharalingam & Wentz, 2003). Transmission electron microscopy (TEM) revealed that the  
238 structural integrity of the double-layered NE was ruptured in ES1 cells versus controls (**Figure 5c**). We also  
239 investigated Ran, a small GTP-binding nuclear protein involved in the regulation of NCT of RNAs and proteins;  
240 Ran shuttles across the NPCs, but is concentrated in the nucleus due to the active delivery mediated by nuclear  
241 transport factor-2. This bias in partitioning is known as the Ran gradient (Clarke & Zhang, 2008).

242 Immunocytochemistry and capillary western analysis of cytoplasmic and nuclear fractions indeed confirmed a

243 decline of the Ran gradient in ES1 cells compared to un-transduced parental reporter cells (**Figure 5d to 5f**). These  
244 data support a view that NE tau inclusions in ES1 cells trigger the separation of NUPs from NPCs, disrupt molecular  
245 trafficking across the nuclear envelope, and thereby contribute to cellular dysfunction that may then trigger  
246 programmed cell death pathways.

247

#### 248 *Dynamic analyses of nuclear-cytoplasmic transport*

249 For dynamic analyses of NCT, tau reporter cells (4RD-YFP P301L/V377M) and the ES1 subline were transiently  
250 transfected with an additional type of reporter construct, a plasmid encoding two proteins indicating the status of  
251 nuclear-cytoplasmic compartmentalization (NCC) events. The NCC reporter plasmid (pLVX-EF1alpha-  
252 2xGFP:NES-IRES-2xRFP:NLS) has been used by others (Eftekharzadeh et al., 2018; Mertens et al., 2015; Paonessa  
253 et al., 2019); it encodes a nuclear export signal (NES) fused to green fluorescent protein (GFP) and a nuclear  
254 localization signal (NLS) fused to red fluorescent protein (RFP) under the control of a human elongation factor-1 $\alpha$   
255 (EF-1 $\alpha$ ) promoter and with an internal ribosome entry sequence (IRES) being located between the two open reading  
256 frames (**Figure 6a**) (Mertens et al., 2015). Corresponding tau reporter cells exhibited a segregated arrangement of  
257 the fluorescent signals; GFP localized in cytoplasm and RFP localized in nuclei (**Figure 6b to 6d**). Although intense  
258 YFP signals of tau inclusion in ES1 cells hindered the analysis of NES-GFP compartmentalization, the increased  
259 levels of local RFP signals in both nuclei and cytoplasm indicates an impairment of NCC (**Figure 6b**). The impaired  
260 NCC in ES1 cells became evident upon quantifying intensities of the pixels along a chord (dotted line with arrow)  
261 placed across the cell bodies and nuclei of transfected cells (**Figure 6c to 6f**).

262 ES1 transfected cells harboring the pLVX-EF1alpha-2xGFP:NES-IRES-2xRFP:NLS plasmid showing the  
263 anticipated segregated pattern of the fluorescent signals were then subjected to a “fluorescence recovery after  
264 photobleaching” (FRAP) analysis (**Figure 7a**). Since the emission spectra of GFP encoded in the NCC reporter and  
265 YFP fluorophore fused to the tau repeat domain are overlapped, we restricted ourselves to the use of RFP signals for  
266 FRAP analyses. RFP signals in the entire images were photobleached, such that nuclear RFP signals appearing *de*  
267 *novo* in the field of view must derive from newly-synthesized molecules. Five initial time-lapse images were taken  
268 as points of reference, with subsequent recovery of signal in the RFP channel measured every 10 min thereafter for 6  
269 hours (**Figure 7b, Supplementary Movie 8 and Movie 9**). Nuclear RFP signals in tau reporter cells recovered

270 within an hour after photobleaching up to  $16.4 \pm 2.2\%$  and reached to  $32.0 \pm 7.0\%$ ; the ES1 cells on the other hand  
271 showed a slower recovery, with only  $4.5 \pm 1.0\%$  signal at one hour and a final attained value of  $9.6 \pm 1.9\%$  (**Figure**  
272 **7c** and **7d**; all figures compared to an average of the reference RFP intensities). These observations are consistent  
273 with defects in the selective NE permeability seen in induced pluripotent stem cells (iPSCs)-derived neurons with  
274 IVS10+16 and P301L *MAPT* mutations (Paonessa et al., 2019), and in primary neurons treated with high molecular  
275 weight (HMW) AD brain fractions containing tau (Eftekharzadeh et al., 2018).

276

### 277 *A demixed liquid state of oligomeric tau on nuclear envelope*

278 We next sought evidence for the *in vivo* formation of a liquid state of tau. In tau reporter cells (4RD-YFP  
279 P301L/V377M) seeded with brain homogenate of CSA Type 2 conformers, dispersed tau-YFP signals were  
280 sequestered to tau inclusion with various morphologies (**Supplementary Figure 7a**). Quantification of image pixels  
281 demonstrated condensation of tau occurred by a seeding reaction, in which signal intensities were concentrated on  
282 NE tau inclusions (**Figure 8a** and **8b**, **Supplementary Figure 7b** and **7c**). The average intensity in the cell bodies of  
283 tau reporter cells was  $23.7 \pm 0.2$  arbitrary units (a.u.), while the seeded reporter cells with TI-2 morphology showed  
284  $14.1 \pm 0.1$  a.u. (**Figure 8b**). In stable ES1 subline, photobleached NE tau inclusions were rapidly recovered (within  
285 15 min) in FRAP analysis. Notably, different focal plane images revealed that tau inclusions showed liquid droplet-  
286 like movements and fused together to increase in size (**Figure 8c** and **8d**, **Supplementary Movie 10**). While  
287 relatively large inclusions such as juxtannuclear inclusions had little ability to recover (**Figure 8e**, **Supplementary**  
288 **Movie 11**). These properties meet common criteria for defining a phase-separated structure under live cell  
289 conditions, namely spherical morphology, fusion events and recovery from photobleaching (Alberti et al., 2019).

290 To further confirm LLPS of tau in response to seeding by exogenous misfolded tau, ES1 cells exhibiting a  
291 heterogeneous repertoire of tau inclusion phenotypes were stained with thioflavin S (ThS), which shows an increase  
292 in the emission of a fluorescent signals upon by binding to fibrillar assemblies (Wegmann et al., 2018; Xu, Martini-  
293 Stoica, & Zheng, 2016). ThS staining readily visualized amorphous and juxtannuclear inclusions in these analyses  
294 (TI-1), but - crucially - not NE inclusions (TI-2), nor small speckles (TI-3) (**Figure 9a**). Intriguingly, particle size  
295 plotted against fluorescent signal for the YFP and ThS double-positive inclusions revealed that YFP-associated area  
296 under the curve was always wider than ThS area (**Figure 9b**), thus indicating that aggregated tau fibrils (ThS-

*LLPS of tau disrupts NPC*

297 positive) have a surrounding milieu of condensed tau existing in a liquid state. The inconsistency in the ratio of ThS  
298 to YFP may indicate a potential involvement of molecular interactions with other polymers in liquid-solid phase  
299 transition under live cell conditions. Particle size distribution in these experiments demonstrated that tau inclusions  
300 less than  $1 \mu\text{m}^2$  were dominant in the YFP-only population, while the number of YFP and ThS double-positive  
301 particles instead peaked in the size range 1 to  $3 \mu\text{m}^2$  (**Figure 9c**). Taken together, these data indicate that dispersed  
302 soluble form of cellular tau condensed and underwent LLPS under conditions of tau seeding. Importantly, the  
303 primary nucleation of tau fibrils, which has been inferred from observations under conditions of molecular crowding  
304 (Ambadipudi et al., 2017; Fichou et al., 2018; Wegmann et al., 2018; X. Zhang et al., 2017), was demonstrated  
305 under here within living cells, with condensed tau droplets ranging in size from 1 to  $3 \mu\text{m}^2$  in diameter (**Figure 9d**)  
306 and with the larger droplets capable of producing fibrillar tau in their interior.

307 **Discussion**

308

309 Perturbations of NCT have been observed in neurodegenerative disorders with a number of protein aggregates and  
310 cytoplasmic assemblies, including artificial  $\beta$ -sheet deposits, Huntingtin inclusions,  $\alpha$ -synuclein aggregates, SGs,  
311 and C9ORF72 G<sub>4</sub>C<sub>2</sub> RNA assemblies (Grima et al., 2017; Jiang et al., 2016; Jovicic et al., 2015; Woerner et al.,  
312 2016; K. Zhang et al., 2018; K. Zhang et al., 2015). For tauopathies, disruption of NCC with high molecular weight  
313 (HMW) tau species derived from AD brain and *MAPT* mutation-mediated NE deformation have been observed in  
314 cortical primary neurons and in neurons derived from induced pluripotent stem cells (iPSCs), respectively  
315 (Eftekharzadeh et al., 2018; Paonessa et al., 2019). We have reported NE tau inclusions as the predominant  
316 morphology in 4RD-YFP P301L/V377M reporter cells seeded with misfolded tau conformers (CSA Type 2) found  
317 in the brains of some aged TgTau<sup>P301L</sup> mice or cortical samples from certain FTLN-MAPT patients given a clinical  
318 diagnosis of bvFTD (Daude et al., 2020; Eskandari-Sedighi et al., 2017). Here we have extended this observation by  
319 establishing a stable subclone, ES1, using CSA Type 2 seeds. ES1 clonal cells partly resemble DS9 clonal cell line,  
320 that propagates synthetic strains derived from recombinant tau (Sanders et al., 2014; Sharma, Thomas, Woodard,  
321 Kashmer, & Diamond, 2018), with regards to Triton X-100 insoluble tau and a 12 kDa product (as the ‘core’ of the  
322 amyloid) after pronase E digestion, but, rather than the speckle-shaped inclusions of DS9 cells, they harbor NE and  
323 heterogeneous fluorescent tau inclusion morphologies. Interestingly, DS10, which is the other clonal line  
324 propagating the synthetic strains, created multiple stably sub-strains easily discerned by different tau inclusion  
325 morphologies (Sharma et al., 2018), whereas ES1 clone derived from brain materials with CAS Type 2 profile  
326 produced a single population of six clones, all identical to ES1 in tau inclusion morphology (**Figure 3a** and  
327 **Supplementary Figure 3a**).

328

329 Fluorescent tau deposits in immortalized 4RD-YFP reporter cells (4RD-YFP P301L/V377M) or GFP-0N4R reporter  
330 cells (Dox:GFP-0N4R P301L) exposed to CSA Type 2 seeds exhibited heterogeneous morphologies, but with NE  
331 inclusions being prominent amongst these. This phenotypic property of tau inclusions persisted after the single cell  
332 cloning (ES1), while, compared with non-seeded control cells, the proliferation rate was lower with loss of cells by  
333 apoptosis becoming evident. This decline in cell viability following tau seeding activity mirrors previous

334 observations for certain types of tau seeds (Kaufman et al., 2016; Sanders et al., 2014). The NE tau inclusions and  
335 decrease in cell viability led us to deduce that interference with NCT is the pathogenic mechanism of tauopathies at  
336 the cellular level. This hypothesis is strongly supported by further findings on ES1 cells including mis-localization  
337 of NUPs into tau inclusions, alteration in the ratio of nuclear to cytoplasmic concentration for the Ran protein and a  
338 decline in NCC. An alternative explanation is that separation of NUPs from NPCs occurs earlier, with mis-localized  
339 NUPs then binding to intrinsically disordered tau and appearing as NE tau inclusions, but this theory of indirect  
340 action then begs the question of the proximal cause of NUPs dissociation.

341

342 Phase transition into demixed liquid state of tau has been reported mainly using *in vitro* cell-free systems with  
343 purified recombinant proteins under conditions of molecular crowding (Ambadipudi et al., 2017; Boyko et al., 2019;  
344 Hernandez-Vega et al., 2017; Majumdar, Dogra, Maity, & Mukhopadhyay, 2019; Singh et al., 2020; Vega et al.,  
345 2019; Wegmann et al., 2018; X. Zhang et al., 2017). Intrinsic and documented aspects of tau biology include  
346 natively disordered structure, inhomogeneous charge distribution, variable patterns of physiological and pathological  
347 phosphorylation, pathogenic mutations, and alternative splicing sites producing six different isoforms, any and/or all  
348 of which might lead to increased acquisition of LLPS (Ambadipudi et al., 2017; Boyko et al., 2019; Wegmann et al.,  
349 2018; X. Zhang et al., 2017). In cultured cells, a GFP-tagged version of the longest isoform of wild-type tau (GFP-  
350 tau441) formed droplet-like accumulations in transiently transfected mouse primary cortical neurons and N2a  
351 neuroblastoma cells with high expression levels (Wegmann et al., 2018). Increased local concentration of  
352 aggregation prone proteins, such as pathogenic TDP43, hnRNPA1 and FUS, has been considered to enhance protein  
353 interactions causing LLPS (Harrison & Shorter, 2017; Molliex et al., 2015; Murakami et al., 2015; Shin &  
354 Brangwynne, 2017). In this study, a tau RD domain/YFP fusion protein with pathogenic mutations on the repeat  
355 domain, P301L and P301L/V337M, is stably dispersed throughout the cytoplasm and the entire cell body, without  
356 forming protein clusters. The final concentration of total tau used to seed the reporter cells, including soluble and  
357 insoluble forms in the presence of sarkosyl, was only 20 ng/mL based on the estimation using CDI (Daude et al.,  
358 2020) whereas signal for total tau in ES1 cells was approximately 8 times greater than that for in non-seeded  
359 controls, as analyzed by capillary western (**Figure 4a** and **4b**). These data strongly suggest that the tau condensation  
360 on NE and inclusion formation occurred in response to the pathogenic tau seeding rather than a hypothetical

361 redistribution effect causing a locally increased tau concentration. Moreover, the NE tau inclusions and small  
362 droplets were found to behave as an oligomeric liquid phase (as determined by a combination of FRAP, live cell  
363 imaging analysis, and amyloid fibril staining with ThS described below), with implications for the cell biology of  
364 disease pathogenesis (**Figure 10**).

365

366 Concerning the pathways leading to cell death, soluble oligomeric, but not monomeric nor fibrillar, forms of tau  
367 have long been considered to be cytotoxic due to their ability to internalize into recipient cells and recruit  
368 monomeric tau into filamentous inclusions (tau seeding activity) (Flach et al., 2012; Frost, Jacks, & Diamond, 2009;  
369 J. L. Guo & Lee, 2011; Lasagna-Reeves, Castillo-Carranza, Guerrero-Muoz, Jackson, & Kaye, 2010; Lasagna-  
370 Reeves et al., 2011; Patterson et al., 2011; Rauch et al., 2020). In addition and more recently, several lines of  
371 evidence suggest that tau uptake and aggregation are not sufficient *per se* to cause immediate neuronal cell death  
372 (Ait-Bouziad et al., 2017; Takeda et al., 2015). Moreover, the presence of neurofibrillary tangles (NFTs) does not  
373 inevitably lead to neuronal and network dysfunction *in vivo* (Kuchibhotla et al., 2014). Taken together, these data  
374 imply a toxic intermediate which may be independent of the processes for internalization and propagation of  
375 intracellular tau aggregates. Experiments described here show that a liquid state condensed tau resulting from the  
376 introduction of pathogenic seeds, at least the tau conformer prominent in CSA Type 2 brain tissues, is recruited to  
377 the NE and triggers a disruption of NCT. In turn, the response of the compromised cells is to initiate a regulated cell  
378 death pathway, this pathway having the hallmarks of apoptosis in the HEK-derived ES1 cells, as shown by  
379 production of cleaved caspase 3, accumulation of Bax dimers, production of cleaved product of lamin B1 and light  
380 microscopic observation of apoptotic bodies (**Figure 4**).

381

382 The scheme for pathogenesis outlined above aligns with neuropathological data for FTLN-MAPT and new insights  
383 into how tau conformers in the brain are not homogeneous but occur in ensembles (Daude et al., 2020). For tau  
384 staining, juxtannuclear signals seen in TI-1 and TI-2 morphologies in acute protein transduction and ES1 cells  
385 produced by seeding with material assigned as a CSA Type 2 conformer signature (**Figure 2a**, **Figure 3e** and  
386 **Supplementary Figure 1**) have a parallel in terms of focal tau immunostaining of some DG neurons of TgTau<sup>P301L</sup>  
387 mice (**Figure 1q**) and in “mini Pick-like bodies” of FTLN-MAPT-P301L cases (Borrego-Ecija et al., 2017). For



388 lamin B1 alterations reflecting changes in nuclear function and architecture as well as secondary alterations induced  
389 by apoptosis-associated caspases action, irregular nuclear margins are seen in FTLD-MAPT-P301L carriers and in  
390 aged TgTau<sup>P301L</sup> mice (**Figure 1f** and **1m**), as well as focal diminutions of signal intensity (**Figure 1d** and **Figure**  
391 **1n**); direct physical interactions between tau and lamin B1 however are not supported, given double-staining results  
392 in DG neurons and analyses of Triton X-100 insoluble ES1 cell fractions. Cytoplasmic lamin B1 puncta in human  
393 brains (**Figure 1g** and **1h**) may reflect apoptotic bodies from partitioning of cellular contents. Conversely, nuclear  
394 clefts detected with lamin B1 antibody were also present in other neurodegenerative diseases (**Table 1**) and in aged  
395 non-Tg mice (**Figure 1k** and **1l**) and were not observed in protein transduced HEK cells and stably-transduced ES1  
396 cells; they thus reflect age-dependent changes but could nonetheless comprise a comorbidity to exacerbate toxic  
397 effects of tau accumulation.

398

399 In sum, our data support a central toxic mechanism where tau conformer ensembles that accumulate in bvFTD,  
400 especially CSA Type 2, give rise to demixed oligomeric tau forms that initiate neuronal death by binding to the NE.  
401 In transduced reporter cells these forms are associated with fluorescent tau inclusion (TI) morphologies TI-1 to TI-3.  
402 An interlocking perspective, participation in a downstream pathogenic pathway, may apply to a fourth morphology  
403 scored as cytoplasmic threads (TI-4). Thus, the TgTau<sup>P301L</sup> mouse brains yielding most TI-4 morphologies in protein  
404 transduction experiments have florid pathology with AT8 phospho-tau antibody that includes numerous tangle-like  
405 deposits. Greater than 96% of the structures scored by EM analysis of these brains are straight fibrils and the  
406 corresponding tau conformer profile (CSA Type 4) resembles that of recombinant tau fibrils (Daude et al., 2020;  
407 Eskandari-Sedighi et al., 2017). These data for TI-4 can be reconciled with the views that a) tangles and filamentous  
408 tau are less toxic than oligomeric tau forms (Flach et al., 2012; Frost et al., 2009; J. L. Guo & Lee, 2011;  
409 Kuchibhotla et al., 2014; Lasagna-Reeves et al., 2010; Lasagna-Reeves et al., 2011; Patterson et al., 2011; Rauch et  
410 al., 2020) and that b) a later-stage *in vivo* event is a liquid to solid phase transition from LLPS tau that nucleates  
411 intracellular tau fibrils ultimately giving rise to fibrillar tau seen by light microscopy in FTLD-MAPT cases. In other  
412 words, once LLPS occurs it may serve as a nursery for the fibrillar tau forms seen at disease endpoint (Kim et al.,  
413 2013; Lee et al., 2016; Mann et al., 2019). The hierarchy of pathogenic events deduced from our results would seem  
414 to have two implications. First, FTLD-MAPT is a 4R-tauopathy that necessarily encompasses tau accumulation in

*LLPS of tau disrupts NPC*

415 astrocytes and oligodendroglia representing diverse pathologies in tauopathy (Gotz et al., 2019), as well as in  
416 neurons; how LLPS phenomena might operate in these other cell lineages and under conditions of  
417 neuroinflammation is wide open and worthy of investigation. Second, the transition to the ensemble of tau  
418 conformers defined by a CSA Type 2 profile from a “cloud” of conformers in a prodromal state (Daude et al., 2020)  
419 would appear to be a crucial point for disease intervention.

420 **Material and methods**

421

422 ***Ethics statement***

423 Ethical review at the University of Alberta was performed by the Research Ethics Management Office, protocols  
424 AUP00000356 and Pro00079472. All other procedures were performed under protocols approved by the  
425 Institutional Review Board at the IDIBAPS brain bank (Barcelona, Spain). In all cases, written informed consent for  
426 research was obtained from patients or legal guardians and the material used had appropriate ethical approval for use  
427 in this project.

428

429 ***Brain tissues of patients and transgenic mice and immunohistochemistry***

430 FTLN-MAPT-P301L patients of both sexes were as described previously (Borrego-Ecija et al., 2017) and as per  
431 **Table 1**. Clinical features of the patients were assessed as per contemporaneous criteria for diagnosis (Gorno-  
432 Tempini et al., 2011; Rascovsky et al., 2011). Control brain samples were obtained from patients who died from  
433 non-neurological diseases; diagnostic neuropathology and retrospective chart reviews were carried out for all  
434 subjects, with particular attention to ruling out other age-related neurodegenerative diseases as previously described  
435 (Daude et al., 2020). TgTau<sup>P301L</sup> mice samples were obtained as described previously (Daude et al., 2020;  
436 Eskandari-Sedighi et al., 2017; Murakami et al., 2006). All animal experiments were performed in accordance with  
437 local and Canadian Council on Animal Care ethics guidelines.

438 Brain tissues from patients and transgenic mice were processed for histologic and immunohistochemical purposes as  
439 described previously (Eskandari-Sedighi et al., 2017). Briefly, each specimen was fixed in neutral buffered 10%  
440 formalin and paraffin-embedded. Six  $\mu\text{m}$  sagittal sections were rehydrated and endogenous peroxidase activity was  
441 blocked by treatment with 3% hydrogen peroxide for 6 min. The sections were then incubated with primary  
442 antibodies at 4°C overnight: anti-phospho-tau mAb, AT8 (1:200, MN1020, Thermo Fisher); anti-Lamin B1 pAb  
443 (1:200, ab16048, Abcam). The target molecules were visualized with horseradish peroxidase using the DAKO ARK  
444 kit according to the manufacturer's instruction or with fluorescent-conjugated secondary antibodies: goat anti-mouse  
445 IgG (H+L) with Alexa Fluor 594 (Invitrogen, A32742); goat anti-rabbit IgG (H+L) with Alexa Fluor 488

446 (Invitrogen, A32731). Nuclei were counterstained using Mayer's hematoxylin or Hoechst 33342 (Invitrogen,  
447 H1399), dehydrated and cover-slipped with permanent mounting medium. The section images were acquired with  
448 NanoZoomer 2.0-RS digital slide scanner (Hamamatsu) and analyzed using NDP.view2 (Hamamatsu) and Image J  
449 software (<https://imagej.nih.gov/ij/>). Assessment of lamin B immunohistochemistry in the dentate gyrus (DG) of  
450 FTLD-MAPT-P301L cases was performed in a semiquantitative way by two observers at a multiheaded microscope  
451 at 40x magnification. For clefts, cytoplasmic staining and discontinuous staining intensity: 0.5 = rare, 1-5 neurons  
452 affected in one field; 1 = mild, 1-5 neurons affected per field in more than one field; 2 = moderate, 6-15 neurons per  
453 field: moderate; 3= severe, >15 neurons affected per field. A similar scheme was used for angular nuclear margins:  
454 0.5 = rare, 1-5 neurons affected in one field; 1 = mild, 1-5 neurons affected per field in more than one field; 2 =  
455 moderate, 6-15 neurons per field or >15 affected per field but little angled; 3= severe, >15 neurons affected per field  
456 and highly angulated. Tau pathologies were scored as described previously (Daude et al., 2020; Eskandari-Sedighi et  
457 al., 2017).

458

#### 459 *Cells and cell culture*

460 A monoclonal HEK293 cell line stably expressing human tau repeat domain (4RD) with aggregation prone  
461 mutations (P301L/V377M) fused to YFP (4RD-YFP P301L/V377M) (Sanders et al., 2014) were maintained at 37°C  
462 with 5% CO<sub>2</sub> in the culture media; Dulbecco's modified Eagle's Medium (DMEM, 11995-065, Gibco) with high  
463 glucose (4.5 g/L) and 2 mM glutamine (Gibco), supplemented with 10% fetal bovine serum (FBS, HyClone) and  
464 Penicillin (10 units/mL)-Streptomycin (10 µg/mL) (Gibco). To induce cell-cycle arrest, cells were treated with  
465 CDK1/2 inhibitor III (CAS 443798-55-8, Calbiochem) (Jorda et al., 2018) for 24 hours at 10 nM concentration. To  
466 generate doxycycline-inducible GFP-0N4R tau reporter line, an enhanced GFP and human WT 0N4R tau sequences  
467 were inserted between the *Bam*HI and *Xho*I restriction sites on the pcDNA5/FRT/TO plasmid (Invitrogen). A short  
468 linker sequence (ATCGATGCA) was incorporated between the eGFP coding sequence (CDS) and 0N4R tau CDS  
469 within the construct. Site directed mutagenesis was performed on the resulting plasmid to generate the P301L  
470 mutation in the tau CDS (pcDNA5/FRT/TO/GFP-0N4R P301L). The final plasmid and the Flp recombinase vector  
471 (pOG44 plasmid, Invitrogen) were packaged with Lipofectamine2000 (Thermo Fisher) and transfected into the Flp-  
472 In T-Rex-293 cell line (Invitrogen) according to manufacturer guidelines. Hygromycin B (Thermo Fisher) was used

473 to select stable integrants which were propagated to generate the final cell line (Dox:GFP-0N4R P301L). To induce  
474 expression of GFP-0N4R P301L, doxycycline is added to the culture media at a final concentration of 10 µg/ml.

475

#### 476 ***Tau cell seeding assay***

477 The reporter cells were seeded as previously described (Daude et al., 2020; Eskandari-Sedighi et al., 2017). Briefly,  
478 tau reporter cells were plated at  $1 \times 10^6$  cells/well of a 12-well culture plates and, on the next day, seeded with  
479 liposome-protein complexes derived from brain homogenate of TgTau<sup>P301L</sup> ill with signs of neurological disease.  
480 Two µL of brain homogenate (5-8 mg/mL protein solution was adjusted by total tau content to 8 µg/mL based on  
481 the estimation of conformation-dependent immunoassay) (Daude et al., 2020) were combined with the same volume  
482 of Lipofectamine 3000 (L3000-015, Thermo Fisher Scientific) and added to the wells. The cells were then incubated  
483 for 6 hours at 37°C and the media containing the liposome-protein complex were replaced with fresh culture media.

484

#### 485 ***Single cell cloning by limiting dilution***

486 The cells were resuspended and counted using the automated cell counter, Countess (Invitrogen) (see Cell viability  
487 assay). Two hundred µL of the cell suspensions with concentration of 3 cells/mL were added to each well of 96-well  
488 culture plates. Single cell clones in each well were inspected after 4 days and then at two days intervals. The cell  
489 clones ensured as only one center of growth were subcultured and frozen in liquid nitrogen until use.

490

#### 491 ***Cell viability***

492 Cells were resuspended by trypsinization and stained with the same volume of trypan blue (Invitrogen). The samples  
493 were loaded into the chamber ports on one side of the Countess cell counting chamber slide (Invitrogen). Viable and  
494 dead cells were counted using the automated cell counter, Countess (Invitrogen). Viability was expressed as a  
495 percentage of live cells to total cells counted. Cell viability was also determined based on lactate dehydrogenase  
496 (LDH) activity in conditioned culture media using a commercial kit (G1780, Promega) following the manufacturer's  
497 instructions. Culture supernatants were collected and incubated with tetrazolium salt, as the substrate, for 30 min at

498 room temperature. The red formazan products of the enzymatic reaction were quantified using a microtiter plate  
499 reader ( $\mu$ Quant, Bio-Tek) at wavelength of 490 nm. The LDH activities were expressed as a percentage to the  
500 control conditioned media.

501

### 502 ***Immunocytochemistry and live cell imaging***

503 Cells were plated on poly-D-lysine (Sigma) and laminin (Sigma) double coated microscope cover glasses (Thermo  
504 Fisher Scientific). For immunocytochemistry, cells were fixed in paraformaldehyde (4%, pH 7.4, Electron  
505 Microscopy Sciences) for 15 min and optionally permeabilized with PBS containing Triton X-100 (0.1%). The fixed  
506 cells were blocked with 1% BSA in PBST (PBS with 0.1% Tween 20) for 30 min and probed with mAb or pAb at  
507 4°C overnight: anti-NPC proteins mAb (1:2,000, ab24609, abcam); anti-NUP98 pAb (1:2,000, NBP1-58188, Novus  
508 Biologicals); anti-Lamin B1 pAb (1:2,000, ab16048, abcam); anti-Ran mAb (1:2,000, 610340, BD Bioscience). To  
509 visualize the target molecules, cells were then incubated with Alexa Fluor 594-conjugated secondary antibody  
510 (1:2,000, Invitrogen, A32742). For amyloid fibril staining, cells were incubated with thioflavin S (ThS, 20  $\mu$ g/mL in  
511 PBST) for 15 min and differentiated with 50% ethanol for 10 sec at room temperature. Counterstaining for nuclei  
512 was performed with DAPI (Thermo Fisher Scientific). Cells were then imaged and analyzed by the laser scanning  
513 confocal microscope as described above (see Live cell image analysis). For live cell imaging, tau reporter cells were  
514 cultured on  $\mu$ -Dish 35 mm plate (81156, ibidi), seeded with pathogenic tau derived from TgTau<sup>P301L</sup>, and analyzed  
515 by live cell imaging. At 6 days post-seeding, time-lapse images of the cells were collected for 16-18 hours (10  
516 min/frame for 96-108 frames) with Z-stack function under identical imaging settings. Image data were acquired with  
517 the laser scanning confocal microscope, ZEN Digital Imaging for LSM 700 (Zeiss) fitted with an environmental  
518 chamber at 37°C and 5% CO<sub>2</sub> and analyzed using Zen 2010b SP1 imaging software (Zeiss) and Image J  
519 (<https://imagej.nih.gov/ij/>).

520

### 521 ***Transmission electron microscopy (TEM)***

522 Cells were collected and fixed in pre-warmed 2% paraformaldehyde in PB (0.1 M phosphate buffer, pH 7.3) for 20  
523 min at 37°C and another 40 min at room temperature. The samples were post-fixed in 1% osmium tetroxide in PB

524 for 1 hour and then incubated with 1% carbohydrazide in distilled water for 10 min at room temperature. After  
525 additional incubation with 1% osmium tetroxide for 1 hour, the samples were dehydrated in an ethanol series and  
526 infiltrated with an increasing concentration of Spurr's resin (14300, Electron Microscopy Sciences) over several  
527 days. The infiltrated cell pellets were transferred to beam capsules and polymerized at 65°C for 24 hours. The resin-  
528 embedded pellets were sectioned with a thickness of 100 nm and incubated in 0.5% uranyl acetate for 1 hour at RT  
529 for negative staining. The thin sections on carbon grids were imaged using JEM-2100 LaB6 TEM (JEOL) with  
530 Gatan DigitalMicrograph (Gatan) software operated at 25 kV. TEM images were then analyzed using ImageJ  
531 software.

532

### 533 ***Subcellular fractionation (Nuclear-cytoplasmic fractionation)***

534 Cells were harvested after trypsinization and plated at  $2 \times 10^6$  cells/well of 6-well culture plates. On the next day,  
535 cells were cross-linked with 2% fresh formaldehyde (28908, Thermo Fisher Scientific) at 37°C for 10 min. The  
536 cross-linking reactions were quenched by adding the same volume of 1M glycine solution at 37°C for 5 min and  
537 cells were harvested. Nuclear and cytoplasmic extracts were prepared using NE-PER Nuclear and Cytoplasmic  
538 Extraction Reagents (78833, Thermo Fisher Scientific) following the manufacturer's instructions. Briefly, cell  
539 membranes were disrupted by addition of the first detergent. Cytoplasmic extracts were recovered by centrifugation  
540 and the nuclei were then lysed with the second detergent to yield nuclear extracts. Nuclear Ran gradient was  
541 analyzed using capillary western assay. For reversal of the formaldehyde cross-links, the extracts were incubated  
542 with Fluorescent Master Mix (ProteinSimple) at 95°C for 20 min and analyzed by the capillary western assay.  
543 Extract purity was determined by probing with anti- $\beta$ -tubulin pAb (NB600-936, Novus Biologicals), and anti-Lamin  
544 B1 pAb (ab16048, Abcam). For details, see western blot and capillary western assays below.

545

### 546 ***Nuclear-cytoplasmic compartmentalization (NCC) assay***

547 Cells were transfected with the NCC reporter construct which carries the IRES-linked sequences for GFP fused NES  
548 and RFP fused NLS under the control of EF1 $\alpha$  promoter (pLVX-EF1 $\alpha$ -2xGFP:NES-IRES-2xRFP:NLS)  
549 (Mertens et al., 2015). One  $\mu$ g of the construct was combined with 2  $\mu$ L Lipofectamine 3000 (L3000-015, Thermo

550 Fisher Scientific) and added to the cells. The cells were then incubated for 6 hours at 37°C and the media containing  
551 the DNA-liposome complex were replaced with fresh culture media. After 48 hours, images were obtained using the  
552 laser scanning confocal microscope as described above (see Live cell image analysis) and NCC were determined by  
553 Plot Profile analysis using Image J software.

554

#### 555 ***Fluorescence recovery after photobleaching (FRAP) analysis***

556 For FRAP analysis of NCC, cells were plated on  $\mu$ -Dish 35 mm plate and transiently transfected with NCC reporter  
557 construct (see NCC assay). On the next day, RFP signals in nuclear ROIs were obtained as time-lapse images (10  
558 min/frame for 5 frames) (see Live cell image analysis) and then RFP were repeatedly bleached throughout the entire  
559 field. To determine recovery of RFP in nuclear ROIs, post-bleaching time-lapse images were collected for 6 hours  
560 (10 min/frame for 36 frames). Intensities of RFP in nuclear ROIs were measured using Image J software. For FRAP  
561 analysis of condensed liquid tau droplets, ES1 cells were plated on  $\mu$ -Dish 35 mm plate and reference images were  
562 obtained. ROIs including NE tau inclusions were repeatedly bleached and time-lapse images were collected for 30  
563 min (30 sec/frame for 55 frames).

564

#### 565 ***Sedimentation analysis***

566 Sedimentation of tau in the seeded reporter cells was performed as previously described (Kaufman et al., 2016;  
567 Sanders et al., 2014) with some modifications. Briefly, clarified cell lysates were prepared as described above (see  
568 Limited proteolysis) and 10% of each lysate were set aside as total fractions. The rest were centrifuged at 100,000xg  
569 for 1 hour and the supernatants were placed aside as soluble fractions. The pellet was washed with 1.5 mL PBS prior  
570 to ultracentrifugation at 100,000xg for 30 minutes. For insoluble fractions, the pellet was re-suspended in RIPA  
571 buffer (50 mM Tris, 150 mM NaCl, pH 7.4, 1% NP-40, 0.5 % sodium deoxycholate, 4% SDS and 100 mM DTT)  
572 and sonicated at 30 amplitude for 3 min. Protein concentrations were normalized by BCA protein assay (Pierce) and  
573 tau in each fraction were analyzed by capillary western assay.

574



575 ***Western blot and capillary western assays***

576 Protein concentrations of each sample were normalized by BCA protein assay (Pierce). The samples were resolved  
577 on 15% Tris-Glycine gels or NuPAGE Bis-Tris gels (NP0343, Invitrogen), and transferred to PVDF membrane  
578 (Thermo Fisher Scientific). The membranes were blocked with 2% bovine serum albumin (BSA, Darmstadt) in  
579 TBST (TBS with 0.1% Tween 20) and probed with monoclonal (mAb) or polyclonal (pAb) antibodies at 4°C  
580 overnight: anti-tau mAb ET3 (Espinoza, de Silva, Dickson, & Davies, 2008) (1:500); anti-tau mAb RD4 (1:500, 05-  
581 804, Millipore); anti-Cleaved Caspase-3 pAb (1:2,000, #9661, Cell Signaling Technology); anti-Bax mAb (1:2,000,  
582 ab32503, abcam); anti-β-actin mAb (1:10,000, Abcam, ab20272). Anti-mouse IgG pAb conjugated to horseradish  
583 peroxidase (1:10,000, 170-6516, Bio-Rad) or anti-rabbit IgG pAb conjugated alkaline phosphatase (1:10,000,  
584 S3731, Promega) were used as secondary antibodies and visualized by detecting chemiluminescence (32209, Pierce)  
585 or fluorescence (S1000, Promega) signals. The membranes were stripped in western blot stripping buffer (46430,  
586 Thermo Fisher Scientific) and re-probed as needed.

587 Capillary western was performed as described in a previous report (Castle, Daude, Gilch, & Westaway, 2019).  
588 Reagents and equipment were purchased from ProteinSimple unless stated otherwise. Cell lysates or fractions were  
589 incubated with Fluorescent Master Mix at 95°C for 5 min. Four microliters of each sample were loaded into the top-  
590 row wells of plates preloaded with proprietary electrophoresis buffers designed to separate proteins of 12-230 kDa.  
591 Subsequent rows of the plate were filled with blocking buffer, primary and secondary antibody solutions, and  
592 chemiluminescence reagents, according to the manufacturer's instructions. Primary antibodies were anti-tau mAb  
593 ET3 (Espinoza et al., 2008) (1:50), anti-Ran mAb (1:1,000, 610340, BD Bioscience), anti-β-tubulin pAb (1:1,000,  
594 NB600-936, Novus Biologicals), and anti-Lamin B1 pAb (1:1,000, ab16048, abcam). Secondary antibodies were  
595 anti-mouse or anti-rabbit secondary HRP conjugate. Peak area calculations and generation of artificial lane view  
596 were performed by the Compass software using the default Gaussian method.

597

598 ***Limited proteolysis***

599 Cell pellets were thawed on ice, lysed by triturating in PBS containing 0.05% Triton X-100 and protease inhibitors  
600 (cComplete, Roche) and clarified by 5 min sequential centrifugations at 500xg and 1000xg. The cell lysates (1

601  $\mu\text{g}/\mu\text{L}$ ) were enzymatically digested with 50  $\mu\text{g}/\text{mL}$  pronase E (Roche) at 37°C for 1 hour followed quenching with  
602 protease inhibitors and SDS-PAGE loading buffer, 15  $\mu\text{g}/\text{mL}$  proteinase K (Ambion) at 37°C for 1 hour followed  
603 quenching with SDS-PAGE loading buffer, and 40  $\mu\text{g}/\text{mL}$  thermolysin (Sigma) at 65°C for 30 min followed  
604 quenching with 0.5 M EDTA and SDS-PAGE loading buffer, respectively. The undigested tau fragments in each  
605 enzymatic reaction were determined by western blot analysis using anti-tau mAb ET3 (Espinoza et al., 2008) or anti-  
606 tau mAb RD4 (05-804, Millipore). For details, see western blot and capillary western assays above.

607

### 608 *Statistical analysis*

609 The number of independent experiments or biological replicates of compared groups were at least  $n=3$  for each  
610 observation. Statistical analysis for the quantitative data including cell viability, western blot, capillary western  
611 assay and FRAP analysis was performed using unpaired, two-tailed student t-test. Statistical analysis of all data was  
612 performed using PRISM version 5 software (GraphPad Software).

613 **Acknowledgements**

614

615 Work in the Westaway lab was funded by the Canadian Institutes of Health Research (CIHR PS148962 and  
616 GER163048) and by Alberta Innovates Biosolutions (ABIBS AEP 201600021 and 20160023). Instrumentation was  
617 supported by the Canada Foundation for Innovation (NIF21633) and by the Alberta Synergies in Alzheimer's and  
618 Related Disorders (SynAD) program, which is funded by the Alzheimer Society of Alberta and Northwest  
619 Territories through the 'Hope for Tomorrow' program and the University Hospital Foundation. DW was supported  
620 through a Canada Research Chair (Tier 1) and EG was supported by a scholarship from CONACYT (472481). We  
621 are indebted to the Neurological Tissue Bank of the Biobank-Hospital Clinic-IDIBAPS, Barcelona, Spain and  
622 Teresa Ximelis for sample and data procurement and to all brain donors and their families for generous brain  
623 donation for research. Special thanks go to Drs. Laura Molina-Porcel and Ellen Gelpi for the lamin B analyses  
624 presented in Table 1. The authors thank Dr. Xuejun Sun for assistance with EM image analysis and Dr. Valerie Sim  
625 for use of the LSM 710 microscope.

626

627 **Author contributions.**

628 S.G.K. and D.W. conceived the project. S.G.K., Z.Z.H., N.D., E.M., S.W., L.M.P. and E.G. performed experiments.  
629 All authors were involved in data collection and analysis. S.G.K. and D.W. wrote and revised the manuscript, which  
630 was approved by all authors before submission.

631

632 **Additional information**

633 Conflict of Interest: The authors declare that they have no conflict of interest.

634 **Table 1** Nuclear deformation of granular neurons in the dentate gyrus of human patients with FTLD-MAPT or other  
635 neurodegenerative disorders

| Clinical diagnosis | Age at death | Sex | Nuclear morphology based on lamin B1 staining |        |         |         | Phospho-tau |
|--------------------|--------------|-----|-----------------------------------------------|--------|---------|---------|-------------|
|                    |              |     | Cleft                                         | Cytopl | Discont | Angular |             |
| Control            | 31           | M   | 0.5                                           | 0      | 0       | 0.5     | 0           |
| Control            | 70           | M   | 1                                             | 0      | 0 vs UK | 2       | 0           |
| Control            | 76           | M   | 2                                             | 0      | 0       | 1       | 1+          |
| Control            | 78           | M   | 3                                             | 0      | 0       | 2       | 1+          |
| Control            | 81           | F   | 1                                             | 0      | 0 vs UK | 1       | 0           |
| AD                 | 72           | F   | 0.5                                           | 0      | 0       | 0.5     | 1+          |
| AD                 | 92           | F   | 3                                             | 0.5    | 0.5     | 3       | 2+          |
| <i>GRN</i>         | 60           | M   | 3                                             | 0.5    | 0.5     | 2       | 0           |
| <i>GRN</i>         | 64           | M   | 3                                             | 0      | 0.5     | 3       | 1+          |
| ALS                | 50           | M   | 3                                             | 0      | 0       | 2       | 0           |
| ALS                | 50           | M   | 3                                             | 0      | 0       | 1       | 0           |
| ALS                | 51           | M   | 2                                             | 0      | 0       | 1       | 0           |
| ALS                | 63           | M   | 3                                             | 0      | 0.5     | 1       | 0           |
| ALS                | 64           | M   | 2                                             | 0      | 0       | 1       | 0           |
| ALS/FTD            | 59           | M   | 2                                             | 0.5    | 0.5     | 1       | 0           |
| FTLD-P301L         | 49           | M   | 3                                             | 2      | UK      | 2       | ND          |
| FTLD-P301L         | 52           | M   | 2                                             | 2      | 1       | 3       | 3+          |
| FTLD-P301L         | 53           | M   | 3                                             | 3      | 1       | 3       | 3+          |
| FTLD-P301L         | 56           | M   | 3                                             | 3      | 2       | 2       | 3+          |
| FTLD-P301L         | 58           | M   | 2                                             | 2      | 1       | 1       | 3+          |
| FTLD-P301L         | 58           | M   | 3                                             | 3      | 2       | 2       | 3+          |
| FTLD-P301L         | 61           | F   | 2                                             | 1      | 1       | 1       | 3+          |
| FTLD-P301L         | 63           | F   | 2                                             | 2      | 1       | 2       | 3+          |
| FTLD-P301L         | 72           | M   | 3                                             | 3      | 2       | 3       | 3+          |
| FTLD-P301L         | 75           | M   | 3                                             | 1      | 0.5     | 3       | 3+          |

636

637 Table after (Borrego-Ecija et al., 2017), arranged by clinical diagnosis: control, non-neurological diseases; AD,  
638 Alzheimer disease; *GRN*, mutations in the progranulin gene; ALS, amyotrophic lateral sclerosis; ALS/FTD, ALS  
639 and frontotemporal dementia; FTLD-P301L, frontotemporal lobar degeneration with P301L mutation in the *MAPT*  
640 gene. M, male; F, female. Cleft, nuclear cleft; Cytopl, cytoplasmic granular lamin B stain; Discont, discontinuous  
641 nuclear edge; Angular, angled nuclear envelope. UK, unknown; ND, not detected. Scoring criteria for tau deposits as  
642 per (Borrego-Ecija et al., 2017; Daude et al., 2020).

643 **Figure 1.**

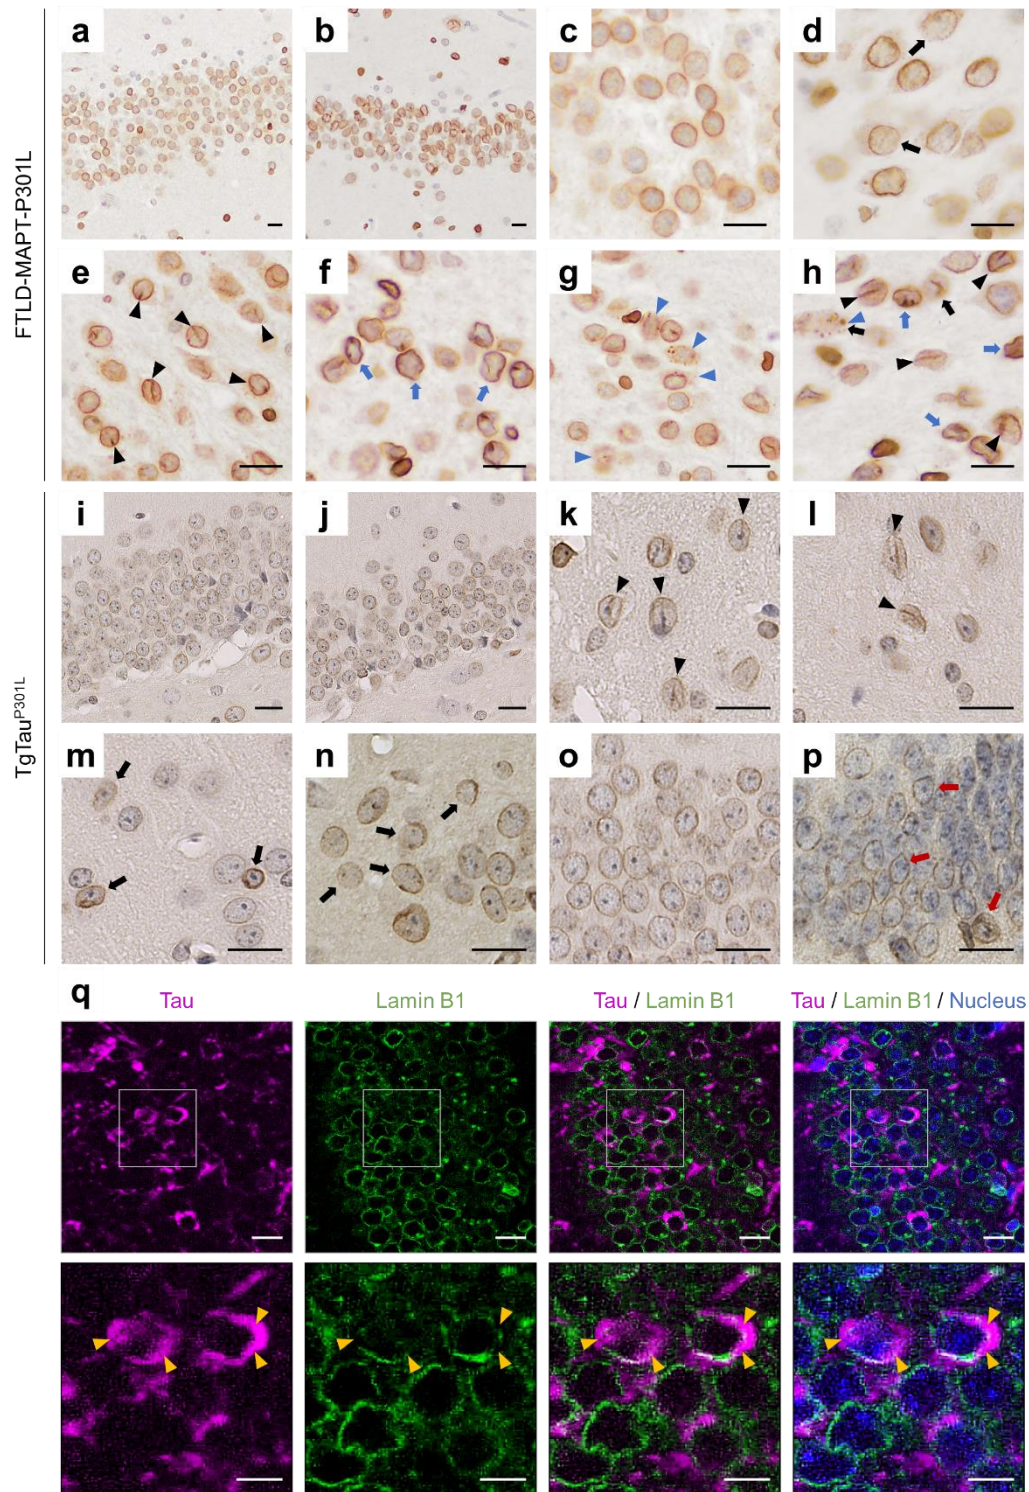

644

645 **Figure 1** Deformation of neuronal nuclear envelopes in FTLD-tau.

646 Lamin B1 staining for nuclear lamina delineated the nuclear membrane of granular neurons in the dentate gyrus  
647 (DG) of the hippocampus in a control (**a**). In contrast, neuronal loss and nuclear morphological changes were  
648 evident in the DG of a MAPT-P301L mutation carrier (**b**). In comparison with the control (**c**), lamin B1 staining was  
649 thinner and incomplete in the MAPT-P301L patient (**d**, black arrows). Nuclear deformations including intranuclear  
650 clefts (**e**, black arrowheads) and angular nuclear morphologies (**f**, blue arrows) were observed in the patient with  
651 MAPT-P301L mutation. Some neurons appeared with cytoplasmic granular staining of lamin B1 (**g**, blue  
652 arrowheads) in the region where incomplete lamin B1 staining (black arrow), intranuclear clefts (black arrowheads)  
653 and angular nuclei (blue arrows) were found (**h**). Compared to the non-Tg mice (**i**), TgTau<sup>P301L</sup> showed loss of  
654 granular neurons in the DG (**j**). Intranuclear clefts (black arrowheads) were observed in the thalamus of aged non-Tg  
655 (**k**) and in TgTau<sup>P301L</sup> mice (**l**). Variations in staining intensities of lamin B1 (black arrows) in the frontal cortex (**m**,  
656 thicker) and the DG (**n**, thinner and incomplete) of TgTau<sup>P301L</sup>. Unlike the control (**o**), angular nuclear morphologies  
657 were found in the DG of the TgTau<sup>P301L</sup> (**p**). **q**. Immunofluorescent staining of phosphorylated tau (magenta, AT8)  
658 and lamin B1 (green) revealed that areas of discontinued nuclear membrane were overlapped with tau deposits  
659 (yellow arrowheads) in TgTau<sup>P301L</sup>. Nuclei were counterstained with DAPI (blue). Scale bars, 20  $\mu$ m and 10  $\mu$ m in  
660 the boxed images.

661



662 **Figure 2.**

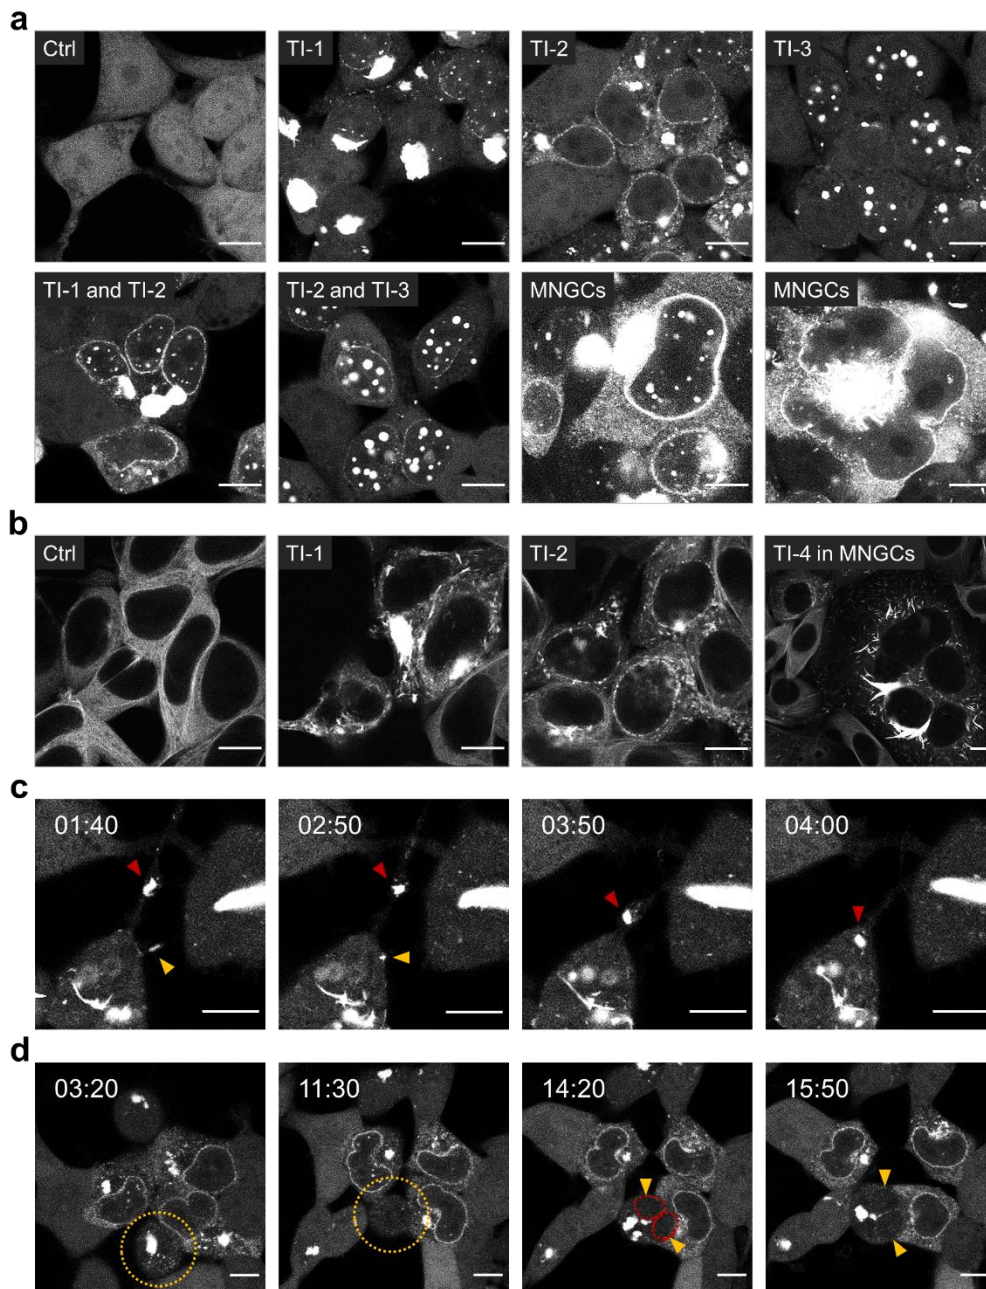

663

664 **Figure 2** Heterogeneous morphology of tau inclusions in tau reporter cells.

665 **a** and **b**. Tau reporter cells (**a**, 4RD-YFP P301L/V377M; **b**, Dox:GFP-0N4R P301L) were seeded with brain  
666 homogenate of aged TgTau<sup>P301L</sup> including CSA Type 2 tau conformers and imaged at 6 days post seeding. Diverse  
667 tau inclusion (TI) morphologies were observed; a large mass of aggregated tau with no specific pattern (amorphous,

*LLPS of tau disrupts NPC*

668 TI-1), juxtannuclear and nuclear membrane inclusions (nuclear envelope, NE, TI-2), granular inclusions (speckles,  
669 TI-3), and threads (TI-4). Some cells showed mixed TI morphologies appearing as TI-1 and TI-2, or TI-2 and TI-3  
670 simultaneously. Multinucleated giant cells (MNGCs) were characterized by apparent NE inclusions with increased  
671 cytoplasmic tau signals (**a**) and thread shapes (**b**). **c** and **d**. Live cell imaging analysis of the seeded reporter cells  
672 (4RD-YFP P301L/V377M). Time-lapse images were collected at 6 days post seeding by recording photographs for  
673 16 hours at one frame every 10 min (1/10 frame/min). **c**. Cell-to-cell spread of tau inclusions through tunneling  
674 nanotube-like protrusion of plasma membrane (both red and yellow arrowheads). **d**. Multinucleated cells emerged  
675 through a failure in cell division (yellow arrowheads). Ctrl, control cells seeded with the brain homogenate of non-  
676 Tg mice. Scale bar, 10  $\mu$ m.

677



678 **Figure 3.**

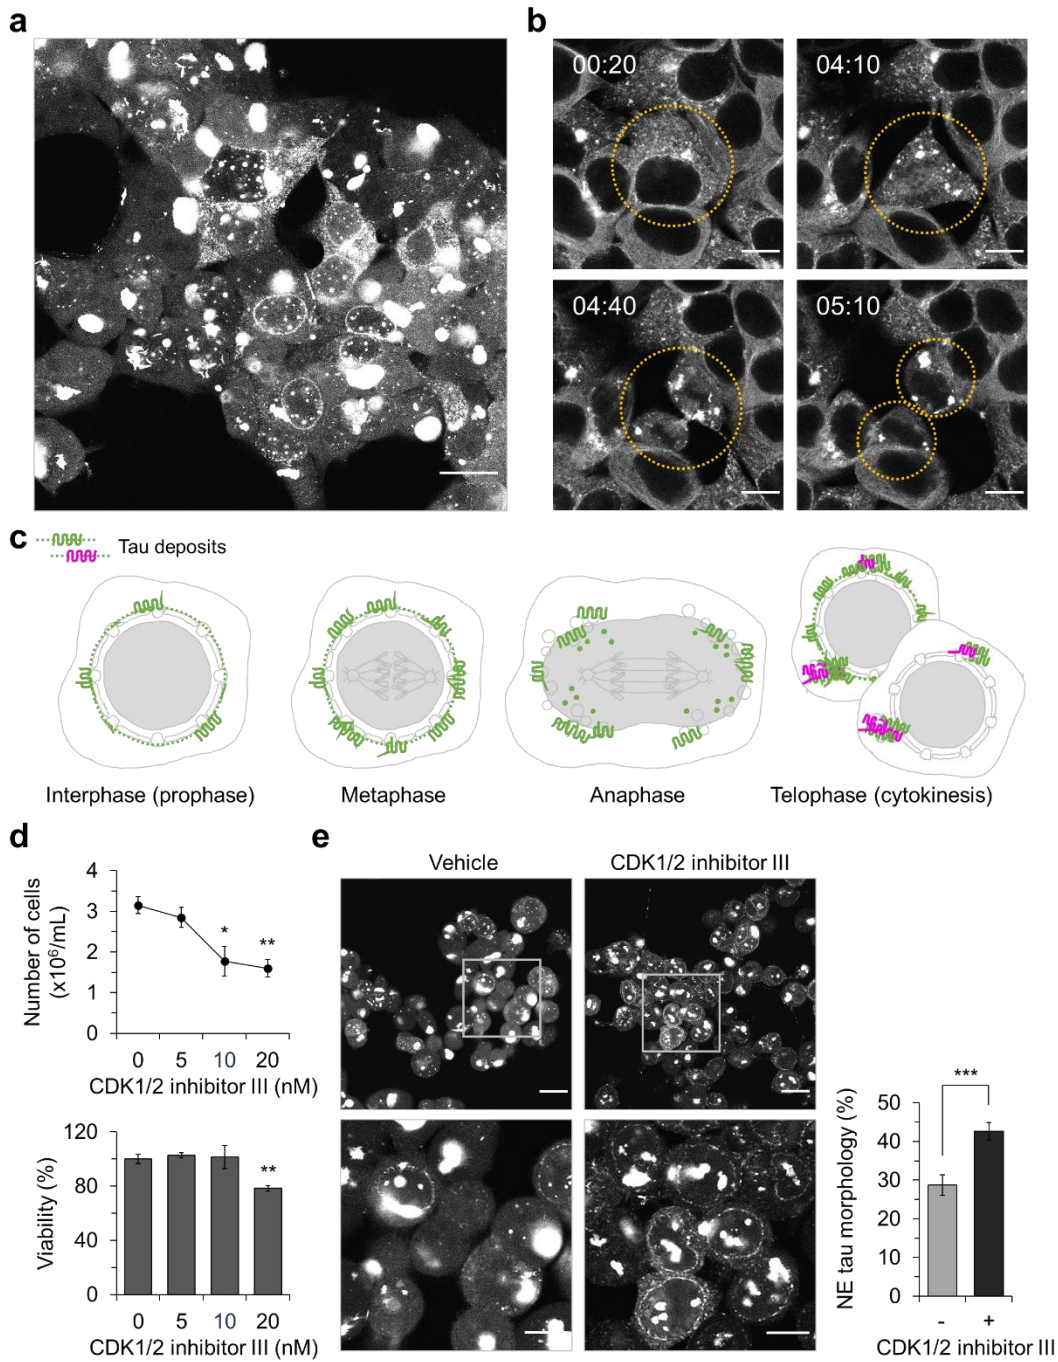

679

680 **Figure 3** Tau inclusions in the clonal subline on the nuclear envelope.

681 **a.** Tau reporter cells (4RD-YFP P301L/V377M) were seeded with brain homogenates of CSA Type 2 TgTau<sup>P301L</sup>

682 and subcloned (ES1). The ES1 exhibited heterogenous morphology of tau inclusions. Scale bar, 20  $\mu$ m. **b.** Live cell

683 imaging as per **Figure 2** revealed that tau inclusions in the seeded reporter cells (Dox:GFP-0N4R P301L) underwent  
684 morphological changes. Cells were imaged every 10 min for 16 hours. Scale bar, 10  $\mu$ m. **c.** A schematic of  
685 morphological changes of NE tau inclusions. Upon tau seeding, cellular tau starts to condense and recruit on the NE  
686 during interphase to prophase. The NE tau loses their morphology since disassembly of the NE commences at  
687 metaphase and NE components are dispersed throughout the cytoplasm at anaphase. During telophase, reassembly  
688 of the NE is completed, while tau combine with each other and appear as heterogeneous morphologies. **d.** Cell cycle  
689 arrest in ES1 cells. CDK1/2 inhibitor III blocked proliferation of ES1 cells with no reduction in viability (n=4). **e.**  
690 CDK1/2 inhibitor III increased the number of cells showing NE tau inclusions compared to the vehicle (DMSO)  
691 treatments. Numbers of cells with NE tau morphology were counted from 12 and 9 different areas of the cover slip  
692 for CDK1/2 inhibitor III (total 781 cells) and vehicle treatments (total 600 cells), respectively. Scale bar, 20  $\mu$ m and  
693 10  $\mu$ m in the boxed images. Error bars represent SEM. \*p < 0.05 and \*\*p < 0.01 in comparison with the controls.  
694

695 **Figure 4.**

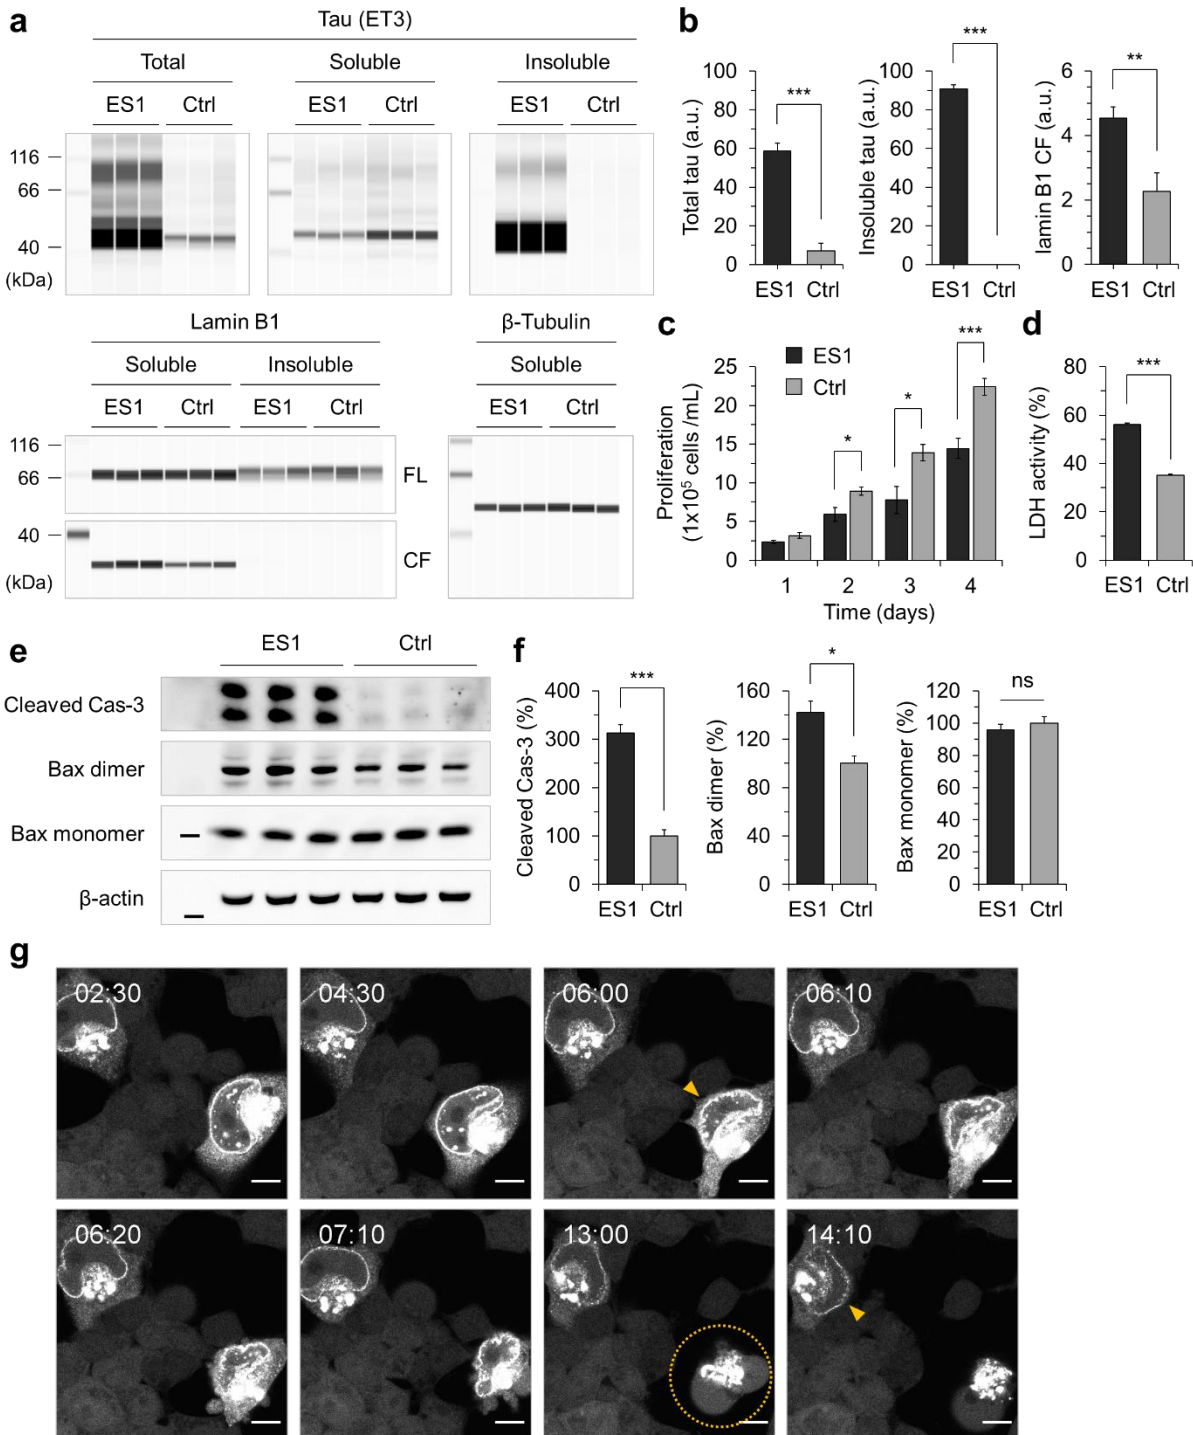

696

697 **Figure 4** Apoptotic cell death with nuclear envelope tau inclusions.

698 **a.** Sedimentation of Triton X-100 insoluble tau. ES1 and control cells (the reporter cells, ‘Ctrl’) were lysed in PBS-T  
699 and sedimented at 100,000xg for 1 hour. The amount of tau and lamin B1 (FL, 66 kDa full-length; CF, 31 kDa  
700 cleaved C-terminal fragment) were analyzed using capillary western using anti-tau mAb (ET3) and anti-lamin B1  
701 pAb, respectively (n=3).  $\beta$ -tubulin, a loading control. **b.** Intensity measurement of the capillary western results in  
702 **(a)**. Intensities were normalized to those of  $\beta$ -tubulin. a.u., arbitrary units. **c.** Proliferation of ES1 cells were  
703 determined by counting viable cells at the indicated time points (n=4). **d.** LDH activity in ES1 conditioned media  
704 were measured as an indicative of cell death at 3 days post splitting (n=4). **e.** Western blot analysis of apoptosis in  
705 ES1 cells. The amount of cleaved caspase 3 and dimerized Bax were analyzed in ES1 cells and control cells (tau  
706 reporter cells, Ctrl) (n=3). **f.** Intensity measurement of the western results in **(a)**. Intensities were normalized to those  
707 of  $\beta$ -actin. **g.** Live cell imaging of tau reporter cells seeded with tau as per **Figure 2**. Cells with NE tau inclusions  
708 underwent apoptotic cell death (yellow circle) followed by nuclear deformation (yellow arrowheads). Cells were  
709 imaged every 10 min for 16 hours. Scale bar, 10  $\mu$ m. Error bars represent SEM. \* $p < 0.05$ , \*\* $p < 0.01$  and \*\*\* $p <$   
710 0.001 in comparison with the controls.

711



712 **Figure 5.**

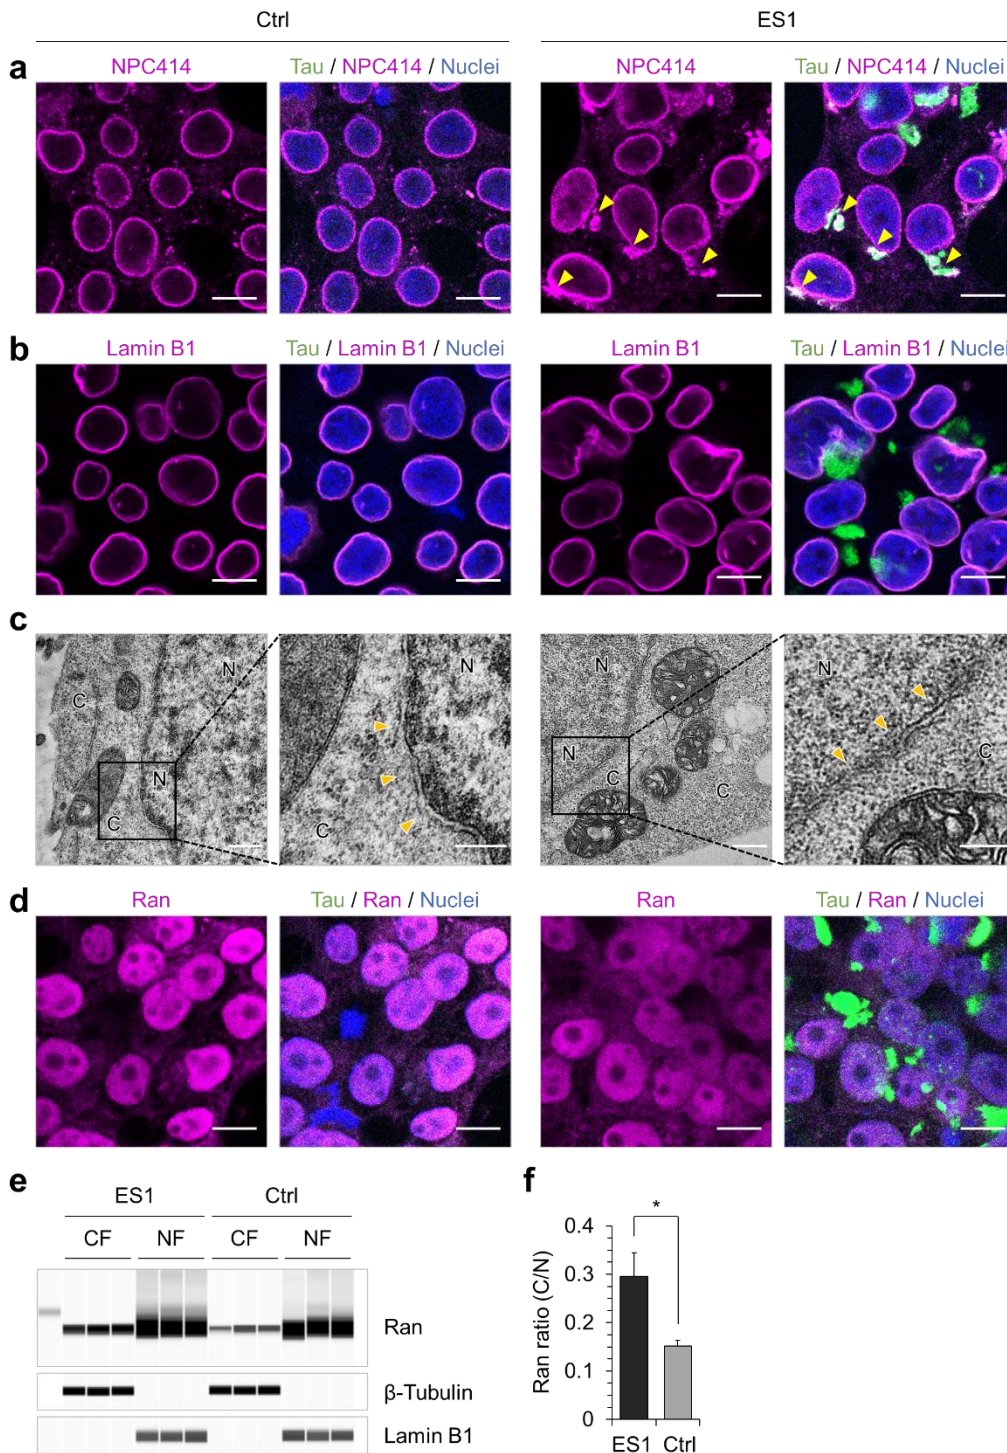

713

714 **Figure 5** Mis-localization of nucleoporins and disruption of Ran gradient.

715 **a** and **b**. Mis-localization of nucleoporins (NUPs). Tau reporter cells (Ctrl, 4RD-YFP P301L/V337M) and ES1 cells  
716 were fixed and permeabilized. NUPs (**a**) and lamin B1 (**b**) were probed and visualized with fluorescent conjugated  
717 secondary antibodies. Tau in green; NUPs and lamin B1 in magenta; nuclei were counterstained with DAPI (blue).  
718 Localization of nucleoporins with tau were indicated by yellow arrowheads in (**a**). Scale bar, 10  $\mu$ m. **c**. TEM  
719 analysis of ES1 cells showed a disruption of the double membrane architecture of NE in comparison with control  
720 cells (Ctrl). Arrowheads indicate NE. C, cytoplasm; N, nucleoplasm. Scale bar, 500 nm and 250 nm in the boxed  
721 images. **d** to **f**. Disruption of Ran gradient. **d**. Ran in tau reporter cells (Ctrl) and ES1 cells were probed by  
722 immunocytochemistry as described in (**a**) and (**b**). Tau in green; Ran in magenta; nuclei were counterstained with  
723 DAPI (blue). **e**. To determine Ran gradient in tau reporter cells and ES1 cells, cytoplasmic and nuclear fractions  
724 were separated by differential detergent fractionation and analyzed using capillary western (n=3). **f**. Intensities of the  
725 capillary western results in (**d**) were normalized to those of  $\beta$ -tubulin (cytoplasmic fractions) or lamin B1 (nuclear  
726 fractions). Ran ratio (C/N), ratios of the cytoplasmic concentration to the nuclear concentration. Scale bar, 10  $\mu$ m.  
727 Error bars represent SEM. \* $p < 0.05$  in comparison with the controls.

728

729 **Figure 6.**

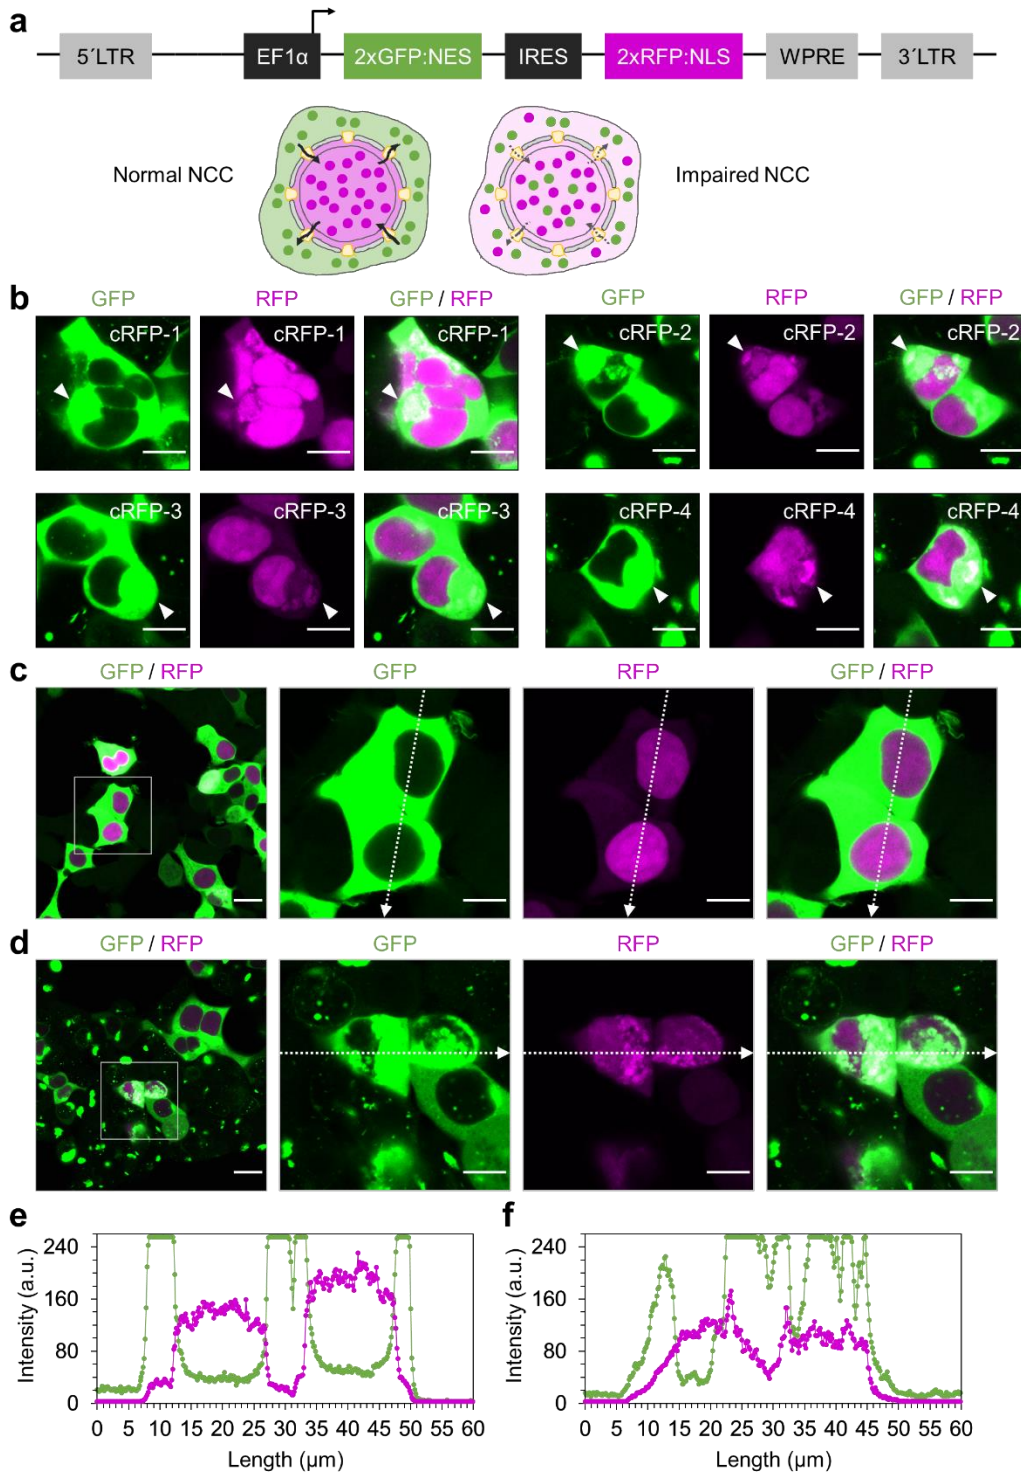

730

731 **Figure 6** Defects in nuclear-cytoplasmic compartmentalization.

732 **a.** Nuclear-cytoplasmic compartmentalization (NCC) reporter construct. NCC reporter encodes GFP and RFP  
733 (colored in magenta) fused with a nuclear export signal (NES) and a nuclear localization signal (NLS), respectively.  
734 Schematic illustration shows co-localization of GFP and RFP, indicating NCC defects under an impaired NCC  
735 condition. **b.** Cytoplasmic localization of NLS-RFP in ES1 cells was indicated by arrowheads. cRFP, cytoplasmic  
736 RFP. Scale bar, 10  $\mu$ m. **c** and **d.** Tau reporter cells (**b**) and ES1 cells (**c**) were transiently transfected with NCC  
737 reporter construct and imaged after 24 hours. Scale bar, 20  $\mu$ m and 10  $\mu$ m in the boxed images. **e** and **f.** Intensities  
738 of green and red fluorescence signals (colored in magenta) in the reporter cells (**c**) and ES1 cells (**d**) were measured  
739 along the arrows with a length of 60  $\mu$ m.

740



741 **Figure 7.**

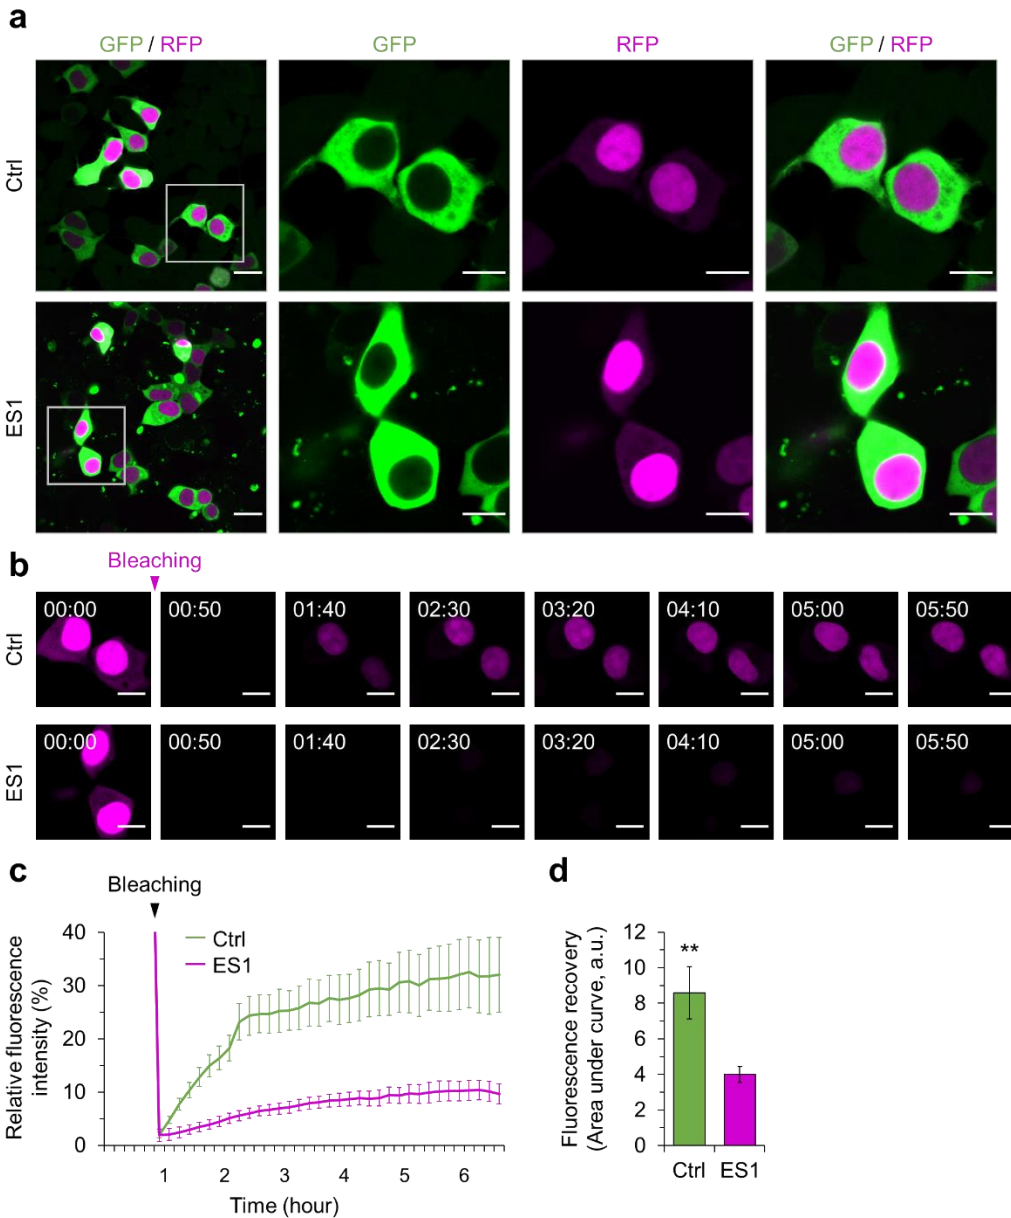

742

743 **Figure 7** Disruption of nuclear-cytoplasmic transport.

744 **a.** Tau reporter cells (Ctrl) and ES1 cells transfected with NCC reporter construct were imaged after 24 hours. Cells  
745 showing a normal nuclear-cytoplasmic compartmentalization were subjected to fluorescence recovery after  
746 photobleaching (FRAP) analysis. Scale bar, 20  $\mu\text{m}$  and 10  $\mu\text{m}$  in the boxed images. **b.** Live cell imaging of the  
747 FRAP analysis. Red fluorescence signals (colored in magenta) were completely photobleached and then images

*LLPS of tau disrupts NPC*

748 were obtained every 10 min for 7 hours. The magenta arrowhead indicates the time when photobleaching was  
749 applied. Scale bar, 10  $\mu$ m. **c.** Realtime measurements of fluorescence recovery of nuclear red signals in tau reporter  
750 cells and ES1 cells (n=8). **d.** The data were presented as accumulated signals under the average curves in (c). Error  
751 bars represent SEM.  $**p < 0.01$  in comparison with the controls (Ctrl).

752

753 **Figure 8.**

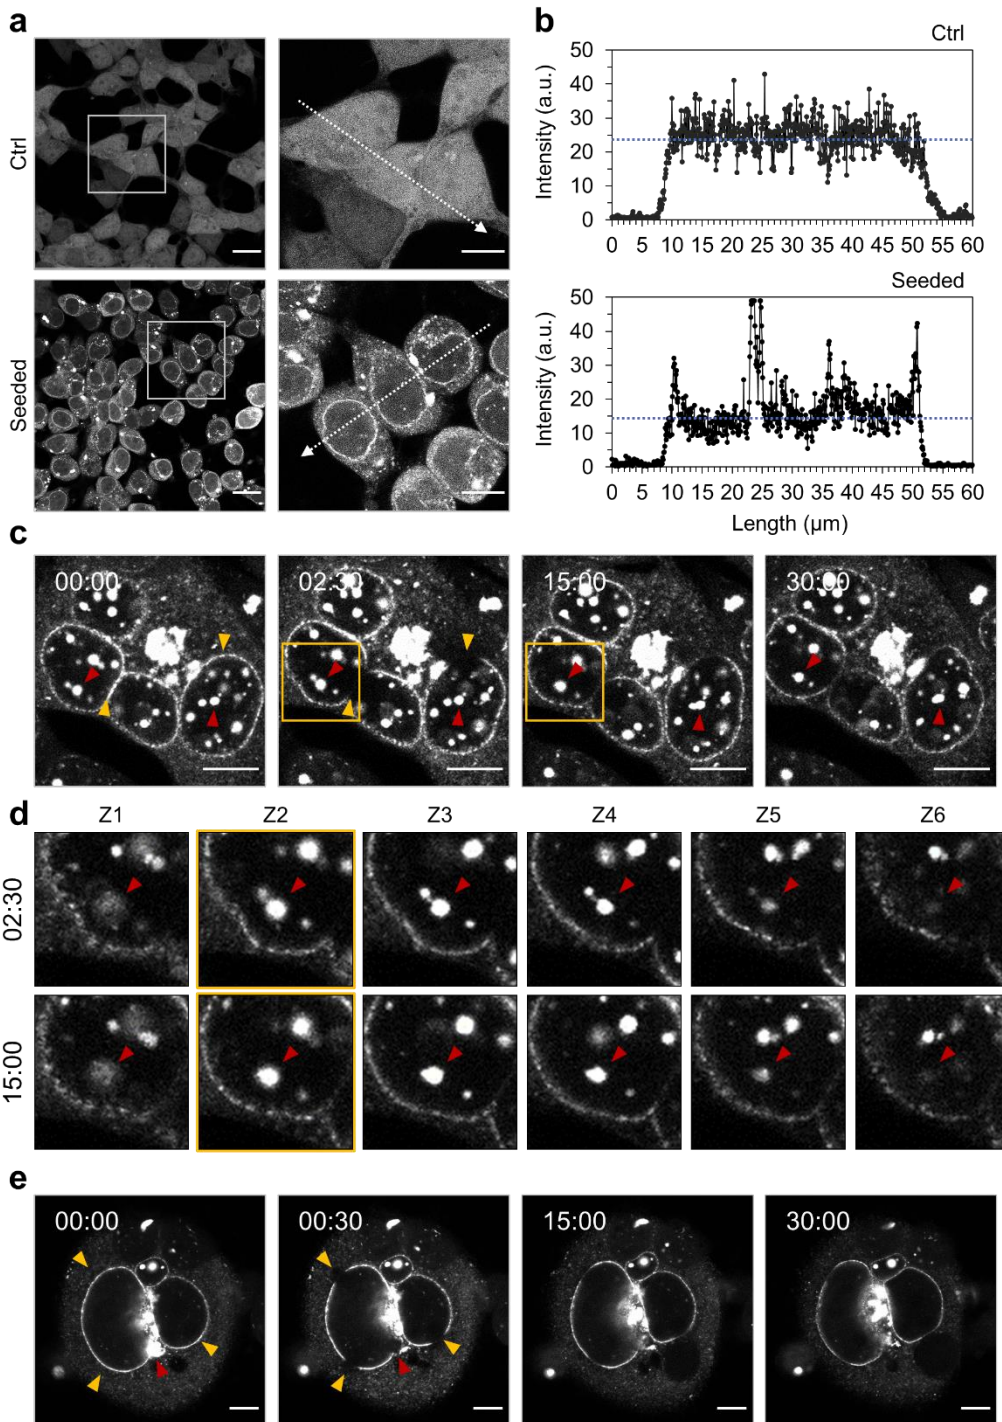

754

755 **Figure 8** Condensation of demixed tau droplets on nuclear envelope.

756 **a** and **b**. Condensation of tau protein occurred with tau seeding. Tau reporter cells (4RD-YFP P301L/V377M, Ctrl)  
757 were seeded with tau and imaged as per **Figure 2 (a)**. Intensities of tau signals were measured along the arrows with  
758 a length of 60  $\mu\text{m}$  (**b**). a.u., arbitrary units. **c**. Fluorescence recovery after photobleaching (FRAP) analysis of NE tau  
759 and fusion of droplet-like tau inclusions. NE tau signals were photobleached (yellow arrowheads) at the indicated  
760 time point and then images were obtained every 30 sec for 30 min. Droplet-like tau inclusions fused together (red  
761 arrowheads). **d**. Different focal plane images of the boxed areas in (**c**). Z1 to Z6 are depths of field from bottom to  
762 top with 1  $\mu\text{m}$  intervals. Arrowheads indicate tau inclusions fused into one droplet. **e**. FRAP analysis of NE tau  
763 (yellow arrowheads) and amorphous tau inclusion (a red arrowhead) in multinucleated cells was performed as per  
764 (**c**). Scale bar, 10  $\mu\text{m}$ .

765

766 **Figure 9.**

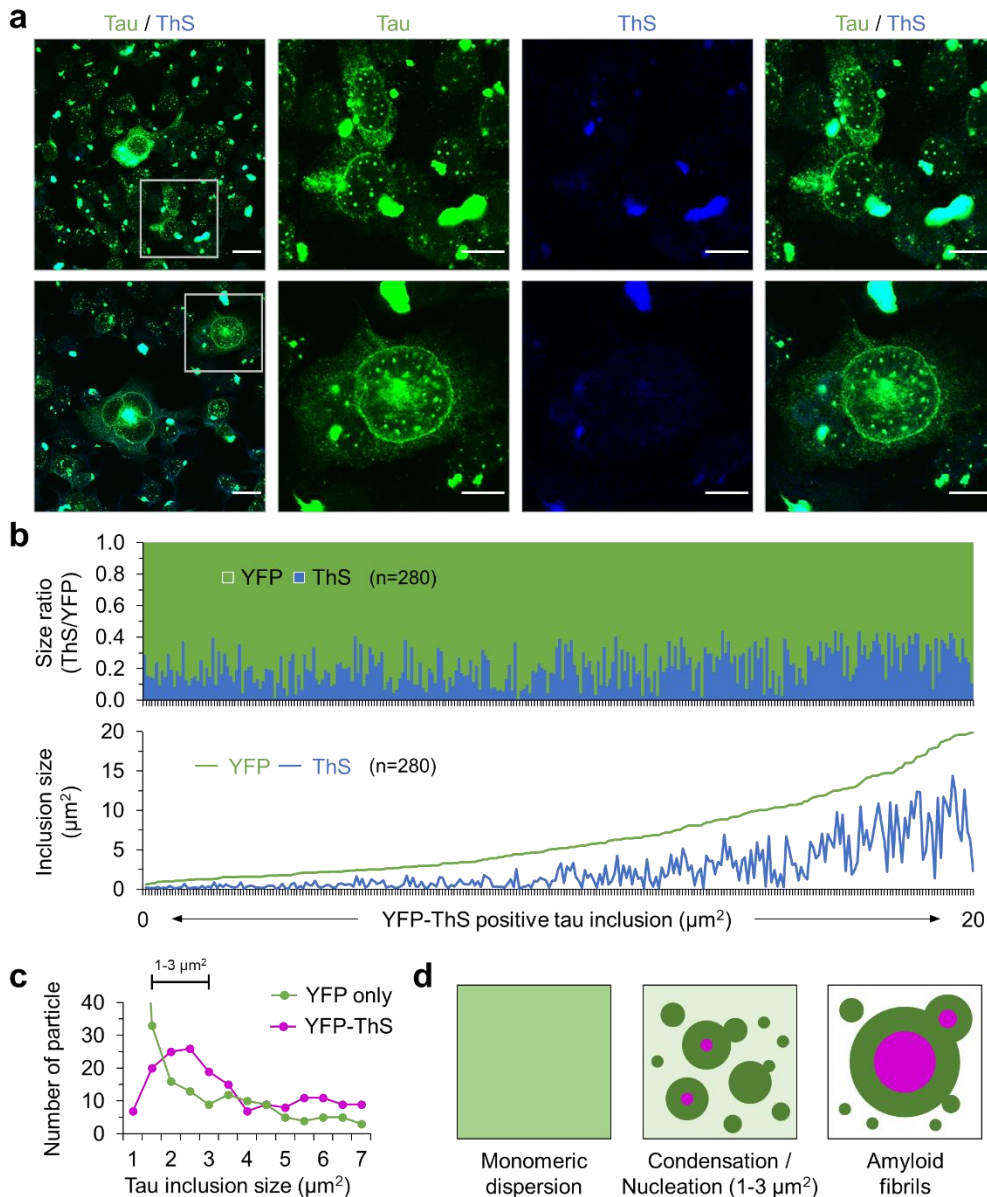

767

768 **Figure 9** Nucleation of amyloid fibrils in tau droplets.

769 **a.** Amyloid fibril formation in ES1 cells. The cells were stained with Thioflavin S (ThS), which increased its  
 770 fluorescence upon binding to  $\beta$ -sheet structure in aggregated amyloid fibrils. Scale bar, 20  $\mu\text{m}$  and 10  $\mu\text{m}$  in the  
 771 boxed images. **b.** Area measurements of YFP-ThS double positive tau inclusions observed in **(a)**. Total 280 particles  
 772 were analyzed and presented as a ratio of ThS to YFP (top) and the area of ThS and YFP within each inclusion  
 773 (bottom). **c.** Size distributions of YFP only positive (n=176) and YFP-ThS double positive (n=263) tau inclusions.

*LLPS of tau disrupts NPC*

774 The majority of YFP only positive tau inclusions were smaller than  $1 \mu\text{m}^2$  (n=139). **d.** Schematic illustration shows  
775 a condensation of monomeric dispersed tau protein into demixed liquid droplets (dark green). Primary nucleation of  
776 tau (magenta) occurs in droplets with a size of 1-3  $\mu\text{m}^2$ . Tau fibrils grow further by recruiting condensed tau droplets  
777 and droplets including small fibrils.

778

779 **Figure 10.**

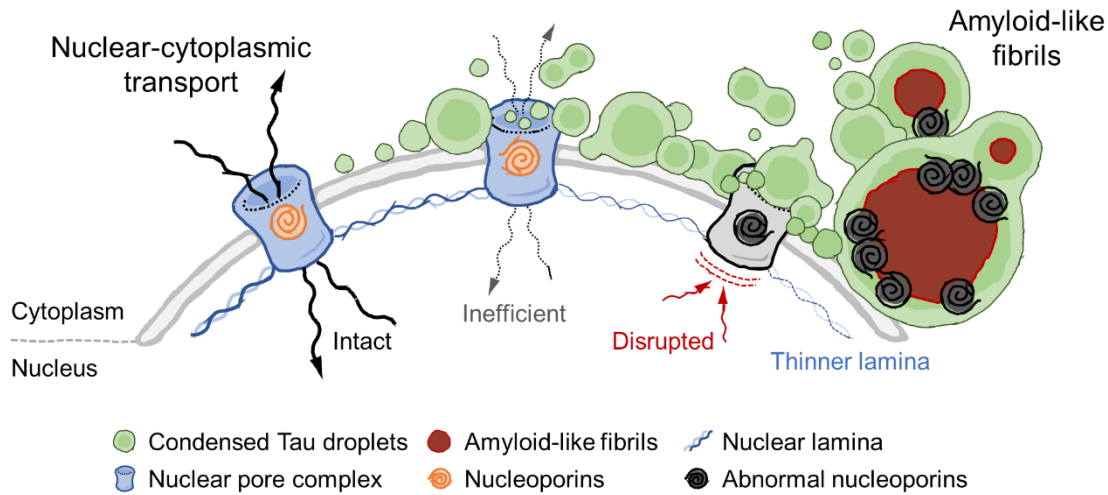

781 **Figure 10** Graphic summary. Condensed tau droplets perturb the nuclear envelope.

782 Under pathogenic conditions (e.g. pathogenic tau seeding), dispersed tau condense as liquid droplets and recruit to  
783 the nuclear envelope, resulting in a decline in NCT. Continuing tau LLPS and condensation cause mis-localization  
784 of NUPs and completely disrupt molecular trafficking between the nucleus and cytoplasm. A liquid-solid phase  
785 transition (i.e. primary nucleation) occurs in the core of the liquid droplets and grows as amyloid-like fibrils.



787 **References**

788

- 789 Ait-Bouziad, N., Lv, G., Mahul-Mellier, A. L., Xiao, S., Zorludemir, G., Eliezer, D., . . . Lashuel, H. A. (2017).  
790 Discovery and characterization of stable and toxic Tau/phospholipid oligomeric complexes. *Nat Commun*,  
791 8(1), 1678. doi:10.1038/s41467-017-01575-4
- 792 Alberti, S., Gladfelter, A., & Mittag, T. (2019). Considerations and Challenges in Studying Liquid-Liquid Phase  
793 Separation and Biomolecular Condensates. *Cell*, 176(3), 419-434. doi:10.1016/j.cell.2018.12.035
- 794 Ambadipudi, S., Biernat, J., Riedel, D., Mandelkow, E., & Zweckstetter, M. (2017). Liquid-liquid phase separation  
795 of the microtubule-binding repeats of the Alzheimer-related protein Tau. *Nat Commun*, 8(1), 275.  
796 doi:10.1038/s41467-017-00480-0
- 797 Beck, M., & Hurt, E. (2017). The nuclear pore complex: understanding its function through structural insight. *Nat*  
798 *Rev Mol Cell Biol*, 18(2), 73-89. doi:10.1038/nrm.2016.147
- 799 Borrego-Ecija, S., Morgado, J., Palencia-Madrid, L., Grau-Rivera, O., Rene, R., Hernandez, I., . . . Sanchez-Valle,  
800 R. (2017). Frontotemporal Dementia Caused by the P301L Mutation in the MAPT Gene:  
801 Clinicopathological Features of 13 Cases from the Same Geographical Origin in Barcelona, Spain. *Dement*  
802 *Geriatr Cogn Disord*, 44(3-4), 213-221. doi:10.1159/000480077
- 803 Boyko, S., Qi, X., Chen, T. H., Surewicz, K., & Surewicz, W. K. (2019). Liquid-liquid phase separation of tau  
804 protein: The crucial role of electrostatic interactions. *J Biol Chem*, 294(29), 11054-11059.  
805 doi:10.1074/jbc.AC119.009198
- 806 Brangwynne, C. P. (2013). Phase transitions and size scaling of membrane-less organelles. *J Cell Biol*, 203(6), 875-  
807 881. doi:10.1083/jcb.201308087
- 808 Bukar Maina, M., Al-Hilaly, Y. K., & Serpell, L. C. (2016). Nuclear Tau and Its Potential Role in Alzheimer's  
809 Disease. *Biomolecules*, 6(1), 9. doi:10.3390/biom6010009
- 810 Caneus, J., Granic, A., Rademakers, R., Dickson, D. W., Coughlan, C. M., Chial, H. J., & Potter, H. (2018). Mitotic  
811 defects lead to neuronal aneuploidy and apoptosis in frontotemporal lobar degeneration caused by MAPT  
812 mutations. *Mol Biol Cell*, 29(5), 575-586. doi:10.1091/mbc.E17-01-0031
- 813 Castle, A. R., Daude, N., Gilch, S., & Westaway, D. (2019). Application of high-throughput, capillary-based  
814 Western analysis to modulated cleavage of the cellular prion protein. *J Biol Chem*, 294(8), 2642-2650.  
815 doi:10.1074/jbc.RA118.006367
- 816 Clarke, P. R., & Zhang, C. (2008). Spatial and temporal coordination of mitosis by Ran GTPase. *Nat Rev Mol Cell*  
817 *Biol*, 9(6), 464-477. doi:10.1038/nrm2410
- 818 Daude, N., Kim, C., Kang, S. G., Eskandari-Sedighi, G., Haldiman, T., Yang, J., . . . Westaway, D. (2020). Diverse,  
819 evolving conformer populations drive distinct phenotypes in frontotemporal lobar degeneration caused by  
820 the same MAPT-P301L mutation. *Acta Neuropathol*. doi:10.1007/s00401-020-02148-4
- 821 Eftekharzadeh, B., Daigle, J. G., Kapinos, L. E., Coyne, A., Schiantarelli, J., Carlomagno, Y., . . . Hyman, B. T.  
822 (2018). Tau Protein Disrupts Nucleocytoplasmic Transport in Alzheimer's Disease. *Neuron*, 99(5), 925-940  
823 e927. doi:10.1016/j.neuron.2018.07.039
- 824 Eskandari-Sedighi, G., Daude, N., Gapeshtina, H., Sanders, D. W., Kamali-Jamil, R., Yang, J., . . . Westaway, D.  
825 (2017). The CNS in inbred transgenic models of 4-repeat Tauopathy develops consistent tau seeding  
826 capacity yet focal and diverse patterns of protein deposition. *Mol Neurodegener*, 12(1), 72.  
827 doi:10.1186/s13024-017-0215-7
- 828 Espinoza, M., de Silva, R., Dickson, D. W., & Davies, P. (2008). Differential incorporation of tau isoforms in  
829 Alzheimer's disease. *J Alzheimers Dis*, 14(1), 1-16. doi:10.3233/jad-2008-14101
- 830 Fichou, Y., Lin, Y., Rauch, J. N., Vigers, M., Zeng, Z., Srivastava, M., . . . Han, S. (2018). Cofactors are essential  
831 constituents of stable and seeding-active tau fibrils. *Proc Natl Acad Sci U S A*, 115(52), 13234-13239.  
832 doi:10.1073/pnas.1810058115
- 833 Flach, K., Hilbrich, I., Schiffmann, A., Gartner, U., Kruger, M., Leonhardt, M., . . . Holzer, M. (2012). Tau  
834 oligomers impair artificial membrane integrity and cellular viability. *J Biol Chem*, 287(52), 43223-43233.  
835 doi:10.1074/jbc.M112.396176
- 836 Frost, B., Jacks, R. L., & Diamond, M. I. (2009). Propagation of tau misfolding from the outside to the inside of a  
837 cell. *J Biol Chem*, 284(19), 12845-12852. doi:10.1074/jbc.M808759200



- 838 Gorno-Tempini, M. L., Hillis, A. E., Weintraub, S., Kertesz, A., Mendez, M., Cappa, S. F., . . . Grossman, M.  
839 (2011). Classification of primary progressive aphasia and its variants. *Neurology*, *76*(11), 1006-1014.  
840 doi:10.1212/WNL.0b013e31821103e6
- 841 Gotz, J., Halliday, G., & Nisbet, R. M. (2019). Molecular Pathogenesis of the Tauopathies. *Annu Rev Pathol*, *14*,  
842 239-261. doi:10.1146/annurev-pathmechdis-012418-012936
- 843 Grima, J. C., Daigle, J. G., Arbez, N., Cunningham, K. C., Zhang, K., Ochaba, J., . . . Rothstein, J. D. (2017).  
844 Mutant Huntingtin Disrupts the Nuclear Pore Complex. *Neuron*, *94*(1), 93-107 e106.  
845 doi:10.1016/j.neuron.2017.03.023
- 846 Guo, J. L., Buist, A., Soares, A., Callaerts, K., Calafate, S., Stevenaert, F., . . . Lee, V. M. (2016). The Dynamics and  
847 Turnover of Tau Aggregates in Cultured Cells: INSIGHTS INTO THERAPIES FOR TAUOPATHIES. *J*  
848 *Biol Chem*, *291*(25), 13175-13193. doi:10.1074/jbc.M115.712083
- 849 Guo, J. L., & Lee, V. M. (2011). Seeding of normal Tau by pathological Tau conformers drives pathogenesis of  
850 Alzheimer-like tangles. *J Biol Chem*, *286*(17), 15317-15331. doi:10.1074/jbc.M110.209296
- 851 Guo, T., Noble, W., & Hanger, D. P. (2017). Roles of tau protein in health and disease. *Acta Neuropathol*, *133*(5),  
852 665-704. doi:10.1007/s00401-017-1707-9
- 853 Guttinger, S., Laurell, E., & Kutay, U. (2009). Orchestrating nuclear envelope disassembly and reassembly during  
854 mitosis. *Nat Rev Mol Cell Biol*, *10*(3), 178-191. doi:10.1038/nrm2641
- 855 Harrison, A. F., & Shorter, J. (2017). RNA-binding proteins with prion-like domains in health and disease. *Biochem*  
856 *J*, *474*(8), 1417-1438. doi:10.1042/BCJ20160499
- 857 Hernandez-Vega, A., Braun, M., Scharrel, L., Jahnelt, M., Wegmann, S., Hyman, B. T., . . . Hyman, A. A. (2017).  
858 Local Nucleation of Microtubule Bundles through Tubulin Concentration into a Condensed Tau Phase. *Cell*  
859 *Rep*, *20*(10), 2304-2312. doi:10.1016/j.celrep.2017.08.042
- 860 Jiang, P., Gan, M., Yen, S. H., Moussaud, S., McLean, P. J., & Dickson, D. W. (2016). Proaggregant nuclear  
861 factor(s) trigger rapid formation of alpha-synuclein aggregates in apoptotic neurons. *Acta Neuropathol*,  
862 *132*(1), 77-91. doi:10.1007/s00401-016-1542-4
- 863 Jorda, R., Hendrychova, D., Voller, J., Reznickova, E., Gucky, T., & Krystof, V. (2018). How Selective Are  
864 Pharmacological Inhibitors of Cell-Cycle-Regulating Cyclin-Dependent Kinases? *J Med Chem*, *61*(20),  
865 9105-9120. doi:10.1021/acs.jmedchem.8b00049
- 866 Jovicic, A., Mertens, J., Boeynaems, S., Bogaert, E., Chai, N., Yamada, S. B., . . . Gitler, A. D. (2015). Modifiers of  
867 C9orf72 dipeptide repeat toxicity connect nucleocytoplasmic transport defects to FTD/ALS. *Nat Neurosci*,  
868 *18*(9), 1226-1229. doi:10.1038/nn.4085
- 869 Kaufman, S. K., Sanders, D. W., Thomas, T. L., Ruchinskas, A. J., Vaquer-Alicea, J., Sharma, A. M., . . . Diamond,  
870 M. I. (2016). Tau Prion Strains Dictate Patterns of Cell Pathology, Progression Rate, and Regional  
871 Vulnerability In Vivo. *Neuron*, *92*(4), 796-812. doi:10.1016/j.neuron.2016.09.055
- 872 Kim, H. J., Kim, N. C., Wang, Y. D., Scarborough, E. A., Moore, J., Diaz, Z., . . . Taylor, J. P. (2013). Mutations in  
873 prion-like domains in hnRNPA2B1 and hnRNPA1 cause multisystem proteinopathy and ALS. *Nature*,  
874 *495*(7442), 467-473. doi:10.1038/nature11922
- 875 Kuchibhotla, K. V., Wegmann, S., Kopeikina, K. J., Hawkes, J., Rudinskiy, N., Andermann, M. L., . . . Hyman, B.  
876 T. (2014). Neurofibrillary tangle-bearing neurons are functionally integrated in cortical circuits in vivo.  
877 *Proc Natl Acad Sci U S A*, *111*(1), 510-514. doi:10.1073/pnas.1318807111
- 878 Lasagna-Reeves, C. A., Castillo-Carranza, D. L., Guerrero-Muoz, M. J., Jackson, G. R., & Kaye, R. (2010).  
879 Preparation and characterization of neurotoxic tau oligomers. *Biochemistry*, *49*(47), 10039-10041.  
880 doi:10.1021/bi1016233
- 881 Lasagna-Reeves, C. A., Castillo-Carranza, D. L., Sengupta, U., Clos, A. L., Jackson, G. R., & Kaye, R. (2011). Tau  
882 oligomers impair memory and induce synaptic and mitochondrial dysfunction in wild-type mice. *Mol*  
883 *Neurodegener*, *6*, 39. doi:10.1186/1750-1326-6-39
- 884 Lee, K. H., Zhang, P., Kim, H. J., Mitrea, D. M., Sarkar, M., Freibaum, B. D., . . . Taylor, J. P. (2016). C9orf72  
885 Dipeptide Repeats Impair the Assembly, Dynamics, and Function of Membrane-Less Organelles. *Cell*,  
886 *167*(3), 774-788 e717. doi:10.1016/j.cell.2016.10.002
- 887 Majumdar, A., Dogra, P., Maity, S., & Mukhopadhyay, S. (2019). Liquid-Liquid Phase Separation Is Driven by  
888 Large-Scale Conformational Unwinding and Fluctuations of Intrinsically Disordered Protein Molecules. *J*  
889 *Phys Chem Lett*, *10*(14), 3929-3936. doi:10.1021/acs.jpcllett.9b01731
- 890 Mann, J. R., Gleixner, A. M., Mauna, J. C., Gomes, E., DeChellis-Marks, M. R., Needham, P. G., . . . Donnelly, C.  
891 J. (2019). RNA Binding Antagonizes Neurotoxic Phase Transitions of TDP-43. *Neuron*, *102*(2), 321-338  
892 e328. doi:10.1016/j.neuron.2019.01.048

- 893 Mertens, J., Paquola, A. C. M., Ku, M., Hatch, E., Bohnke, L., Ladjevardi, S., . . . Gage, F. H. (2015). Directly  
894 Reprogrammed Human Neurons Retain Aging-Associated Transcriptomic Signatures and Reveal Age-  
895 Related Nucleocytoplasmic Defects. *Cell Stem Cell*, *17*(6), 705-718. doi:10.1016/j.stem.2015.09.001
- 896 Molina-Porcel, L., Perez-Navarro, E., Garcia-Forn, M., Westaway, D., Colom-Cadena, M., & Gelpi, E. (2019).  
897 Teaching case 3-2019: Are nuclear clefts or invaginations the niche of intranuclear inclusions in FTLD-  
898 TDP? *Clin Neuropathol*, *38*(3), 97-99. doi:10.5414/NP301202
- 899 Mollieux, A., Temirov, J., Lee, J., Coughlin, M., Kanagaraj, A. P., Kim, H. J., . . . Taylor, J. P. (2015). Phase  
900 separation by low complexity domains promotes stress granule assembly and drives pathological  
901 fibrillization. *Cell*, *163*(1), 123-133. doi:10.1016/j.cell.2015.09.015
- 902 Murakami, T., Paitel, E., Kawarabayashi, T., Ikeda, M., Chishti, M. A., Janus, C., . . . Shoji, M. (2006). Cortical  
903 neuronal and glial pathology in TgTauP301L transgenic mice: neuronal degeneration, memory disturbance,  
904 and phenotypic variation. *Am J Pathol*, *169*(4), 1365-1375. doi:10.2353/ajpath.2006.051250
- 905 Murakami, T., Qamar, S., Lin, J. Q., Schierle, G. S., Rees, E., Miyashita, A., . . . St George-Hyslop, P. (2015).  
906 ALS/FTD Mutation-Induced Phase Transition of FUS Liquid Droplets and Reversible Hydrogels into  
907 Irreversible Hydrogels Impairs RNP Granule Function. *Neuron*, *88*(4), 678-690.  
908 doi:10.1016/j.neuron.2015.10.030
- 909 Nedelsky, N. B., & Taylor, J. P. (2019). Bridging biophysics and neurology: aberrant phase transitions in  
910 neurodegenerative disease. *Nat Rev Neurol*, *15*(5), 272-286. doi:10.1038/s41582-019-0157-5
- 911 Palencia-Madrid, L., Sanchez-Valle, R., Fernandez de Retana, I., Borrego, S., Grau-Rivera, O., Rene, R., . . . de  
912 Pancorbo, M. M. (2019). A unique common ancestor introduced P301L mutation in MAPT gene in  
913 frontotemporal dementia patients from Barcelona (Baix Llobregat, Spain). *Neurobiol Aging*, *84*, 236 e239-  
914 236 e215. doi:10.1016/j.neurobiolaging.2019.08.015
- 915 Paonessa, F., Evans, L. D., Solanki, R., Larrieu, D., Wray, S., Hardy, J., . . . Livesey, F. J. (2019). Microtubules  
916 Deform the Nuclear Membrane and Disrupt Nucleocytoplasmic Transport in Tau-Mediated Frontotemporal  
917 Dementia. *Cell Rep*, *26*(3), 582-593 e585. doi:10.1016/j.celrep.2018.12.085
- 918 Patel, A., Lee, H. O., Jawerth, L., Maharana, S., Janel, M., Hein, M. Y., . . . Alberti, S. (2015). A Liquid-to-Solid  
919 Phase Transition of the ALS Protein FUS Accelerated by Disease Mutation. *Cell*, *162*(5), 1066-1077.  
920 doi:10.1016/j.cell.2015.07.047
- 921 Patterson, K. R., Remmers, C., Fu, Y., Brooker, S., Kanaan, N. M., Vana, L., . . . Binder, L. I. (2011).  
922 Characterization of prefibrillar Tau oligomers in vitro and in Alzheimer disease. *J Biol Chem*, *286*(26),  
923 23063-23076. doi:10.1074/jbc.M111.237974
- 924 Rascovsky, K., Hodges, J. R., Knopman, D., Mendez, M. F., Kramer, J. H., Neuhaus, J., . . . Miller, B. L. (2011).  
925 Sensitivity of revised diagnostic criteria for the behavioural variant of frontotemporal dementia. *Brain*,  
926 *134*(Pt 9), 2456-2477. doi:10.1093/brain/awr179
- 927 Rauch, J. N., Luna, G., Guzman, E., Audouard, M., Challis, C., Sibih, Y. E., . . . Kosik, K. S. (2020). LRP1 is a  
928 master regulator of tau uptake and spread. *Nature*, *580*(7803), 381-385. doi:10.1038/s41586-020-2156-5
- 929 Ryan, V. H., & Fawzi, N. L. (2019). Physiological, Pathological, and Targetable Membraneless Organelles in  
930 Neurons. *Trends Neurosci*, *42*(10), 693-708. doi:10.1016/j.tins.2019.08.005
- 931 Sanders, D. W., Kaufman, S. K., DeVos, S. L., Sharma, A. M., Mirbaha, H., Li, A., . . . Diamond, M. I. (2014).  
932 Distinct tau prion strains propagate in cells and mice and define different tauopathies. *Neuron*, *82*(6), 1271-  
933 1288. doi:10.1016/j.neuron.2014.04.047
- 934 Sharma, A. M., Thomas, T. L., Woodard, D. R., Kashmer, O. M., & Diamond, M. I. (2018). Tau monomer encodes  
935 strains. *Elife*, *7*. doi:10.7554/eLife.37813
- 936 Shin, Y., & Brangwynne, C. P. (2017). Liquid phase condensation in cell physiology and disease. *Science*,  
937 *357*(6357). doi:10.1126/science.aaf4382
- 938 Singh, V., Xu, L., Boyko, S., Surewicz, K., & Surewicz, W. K. (2020). Zinc promotes liquid-liquid phase separation  
939 of tau protein. *J Biol Chem*, *295*(18), 5850-5856. doi:10.1074/jbc.AC120.013166
- 940 Strambio-De-Castillia, C., Niepel, M., & Rout, M. P. (2010). The nuclear pore complex: bridging nuclear transport  
941 and gene regulation. *Nat Rev Mol Cell Biol*, *11*(7), 490-501. doi:10.1038/nrm2928
- 942 Suntharalingam, M., & Wenthe, S. R. (2003). Peering through the pore: nuclear pore complex structure, assembly,  
943 and function. *Dev Cell*, *4*(6), 775-789. doi:10.1016/s1534-5807(03)00162-x
- 944 Takeda, S., Wegmann, S., Cho, H., DeVos, S. L., Commins, C., Roe, A. D., . . . Hyman, B. T. (2015). Neuronal  
945 uptake and propagation of a rare phosphorylated high-molecular-weight tau derived from Alzheimer's  
946 disease brain. *Nat Commun*, *6*, 8490. doi:10.1038/ncomms9490

- 947 Timney, B. L., Raveh, B., Mironska, R., Trivedi, J. M., Kim, S. J., Russel, D., . . . Rout, M. P. (2016). Simple rules  
948 for passive diffusion through the nuclear pore complex. *J Cell Biol*, *215*(1), 57-76.  
949 doi:10.1083/jcb.201601004
- 950 Toyama, B. H., Savas, J. N., Park, S. K., Harris, M. S., Ingolia, N. T., Yates, J. R., 3rd, & Hetzer, M. W. (2013).  
951 Identification of long-lived proteins reveals exceptional stability of essential cellular structures. *Cell*,  
952 *154*(5), 971-982. doi:10.1016/j.cell.2013.07.037
- 953 Vega, I. E., Umstead, A., & Kanaan, N. M. (2019). Efh2 Affects Tau Liquid-Liquid Phase Separation. *Front*  
954 *Neurosci*, *13*, 845. doi:10.3389/fnins.2019.00845
- 955 Vince, J. E., De Nardo, D., Gao, W., Vince, A. J., Hall, C., McArthur, K., . . . Lawlor, K. E. (2018). The  
956 Mitochondrial Apoptotic Effectors BAX/BAK Activate Caspase-3 and -7 to Trigger NLRP3  
957 Inflammasome and Caspase-8 Driven IL-1beta Activation. *Cell Rep*, *25*(9), 2339-2353 e2334.  
958 doi:10.1016/j.celrep.2018.10.103
- 959 Wang, Y., & Mandelkow, E. (2016). Tau in physiology and pathology. *Nat Rev Neurosci*, *17*(1), 5-21.  
960 doi:10.1038/nrn.2015.1
- 961 Wegmann, S., Eftekharzadeh, B., Tepper, K., Zoltowska, K. M., Bennett, R. E., Dujardin, S., . . . Hyman, B. T.  
962 (2018). Tau protein liquid-liquid phase separation can initiate tau aggregation. *EMBO J*, *37*(7).  
963 doi:10.15252/embj.201798049
- 964 Woerner, A. C., Frottin, F., Hornburg, D., Feng, L. R., Meissner, F., Patra, M., . . . Hipp, M. S. (2016). Cytoplasmic  
965 protein aggregates interfere with nucleocytoplasmic transport of protein and RNA. *Science*, *351*(6269),  
966 173-176. doi:10.1126/science.aad2033
- 967 Xu, Y., Martini-Stoica, H., & Zheng, H. (2016). A seeding based cellular assay of tauopathy. *Mol Neurodegener*, *11*,  
968 32. doi:10.1186/s13024-016-0100-9
- 969 Zhang, D., Beresford, P. J., Greenberg, A. H., & Lieberman, J. (2001). Granzymes A and B directly cleave lamins  
970 and disrupt the nuclear lamina during granule-mediated cytolysis. *Proc Natl Acad Sci U S A*, *98*(10), 5746-  
971 5751. doi:10.1073/pnas.101329598
- 972 Zhang, K., Daigle, J. G., Cunningham, K. M., Coyne, A. N., Ruan, K., Grima, J. C., . . . Lloyd, T. E. (2018). Stress  
973 Granule Assembly Disrupts Nucleocytoplasmic Transport. *Cell*, *173*(4), 958-971 e917.  
974 doi:10.1016/j.cell.2018.03.025
- 975 Zhang, K., Donnelly, C. J., Haeusler, A. R., Grima, J. C., Machamer, J. B., Steinwald, P., . . . Rothstein, J. D.  
976 (2015). The C9orf72 repeat expansion disrupts nucleocytoplasmic transport. *Nature*, *525*(7567), 56-61.  
977 doi:10.1038/nature14973
- 978 Zhang, X., Lin, Y., Eschmann, N. A., Zhou, H., Rauch, J. N., Hernandez, I., . . . Han, S. (2017). RNA stores tau  
979 reversibly in complex coacervates. *PLoS Biol*, *15*(7), e2002183. doi:10.1371/journal.pbio.2002183
- 980

1 **SUPPLEMENTARY MATERIALS**

2

3

4 **Tau conformers in FTLD-MAPT undergo liquid-liquid phase separation and perturb the**  
5 **nuclear envelope**

6

7

8 Sang-Gyun Kang<sup>1</sup>, Zhuang Zhuang Han<sup>1,2</sup>, Nathalie Daude<sup>1</sup>, Emily McNamara<sup>1,2</sup>, Serene Wohlgemuth<sup>1</sup>, Jiri G.  
9 Safar<sup>3</sup>, Sue-Ann Mok<sup>1,2</sup> and David Westaway<sup>\*1,2</sup>

10

11 <sup>1</sup>Centre for Prions and Protein Folding Diseases, University of Alberta, Edmonton, AB Canada. <sup>2</sup>Department of  
12 Biochemistry, University of Alberta, Edmonton, AB, Canada. <sup>3</sup>Department of Neurology and Pathology, Case  
13 Western Reserve University, OH, USA.

14

15

16

17

18 \*Correspondence should be addressed to:

19

20 D. Westaway PhD, Centre for Prions and Protein Folding Diseases, 204 Brain and Aging Research Building,  
21 University of Alberta, Edmonton T6G 2M8, Canada. david.westaway@ualberta.ca

22

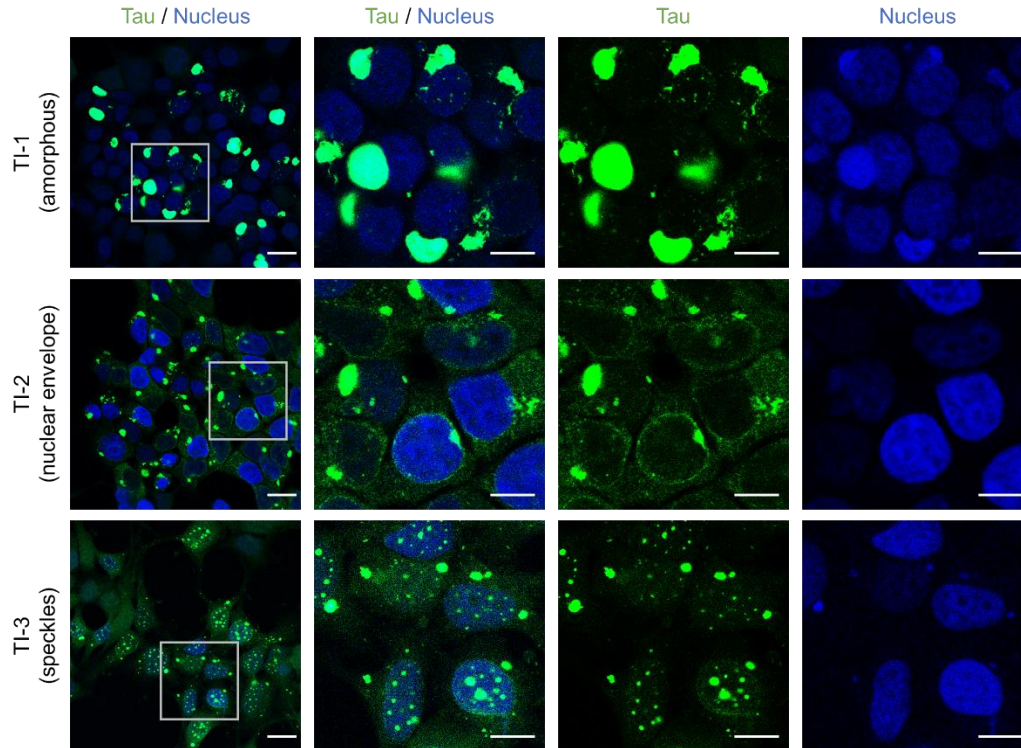

23

24 **Supplementary Figure 1** Tau seeding assay using tau reporter cells.

25 The 4RD-YFP tau reporter cells (P301L/V377M) were seeded with tau derived from aged TgTau<sup>P301L</sup> mice as per  
26 **Figure 2**. Tau inclusions were visualized using the YFP fusion tag (green) and nuclei were counterstained with  
27 DAPI (blue). Cytoplasmic and/or nuclear localization of various types of tau inclusion morphologies were verified  
28 with the nuclear staining. Scale bar, 20  $\mu$ m and 10  $\mu$ m in the boxed images. Related to **Figure 2**.

29



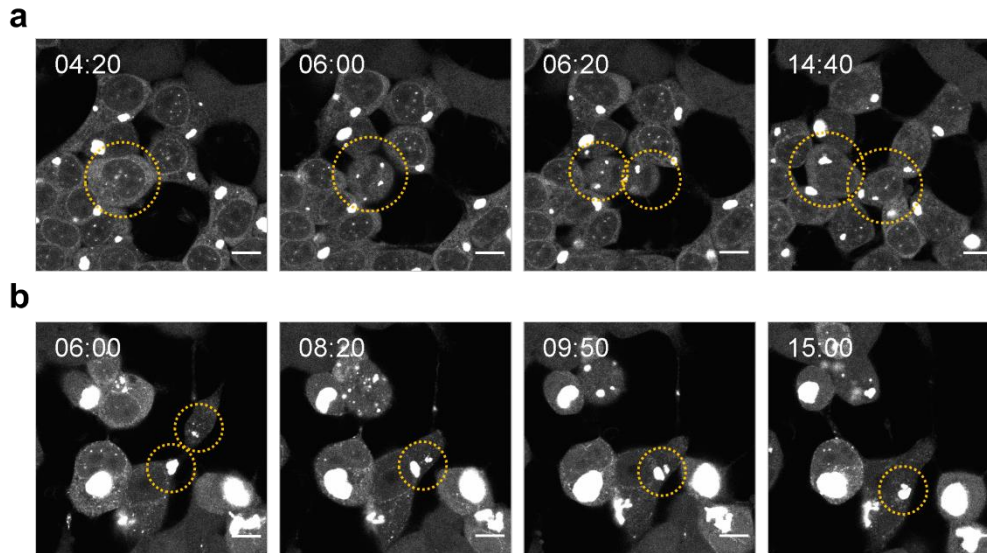

30

31 **Supplementary Figure 2** Live-cell imaging analysis of the seeded tau reporter cells

32 The 4RD-YFP tau reporter cells (P301L/V377M) were seeded with tau as per **Figure 2. a**. TI-positive cells

33 underwent cell division and produced two daughter cells containing TIs (yellow cycles). **b**. TIs within cellular debris

34 were absorbed by adjacent cells and combined with others, resulting in a bigger inclusion (yellow cycles). The cells

35 were imaged every 10 min for 16 hours. Scale bar, 10  $\mu$ m. Related to **Figure 2**.

36

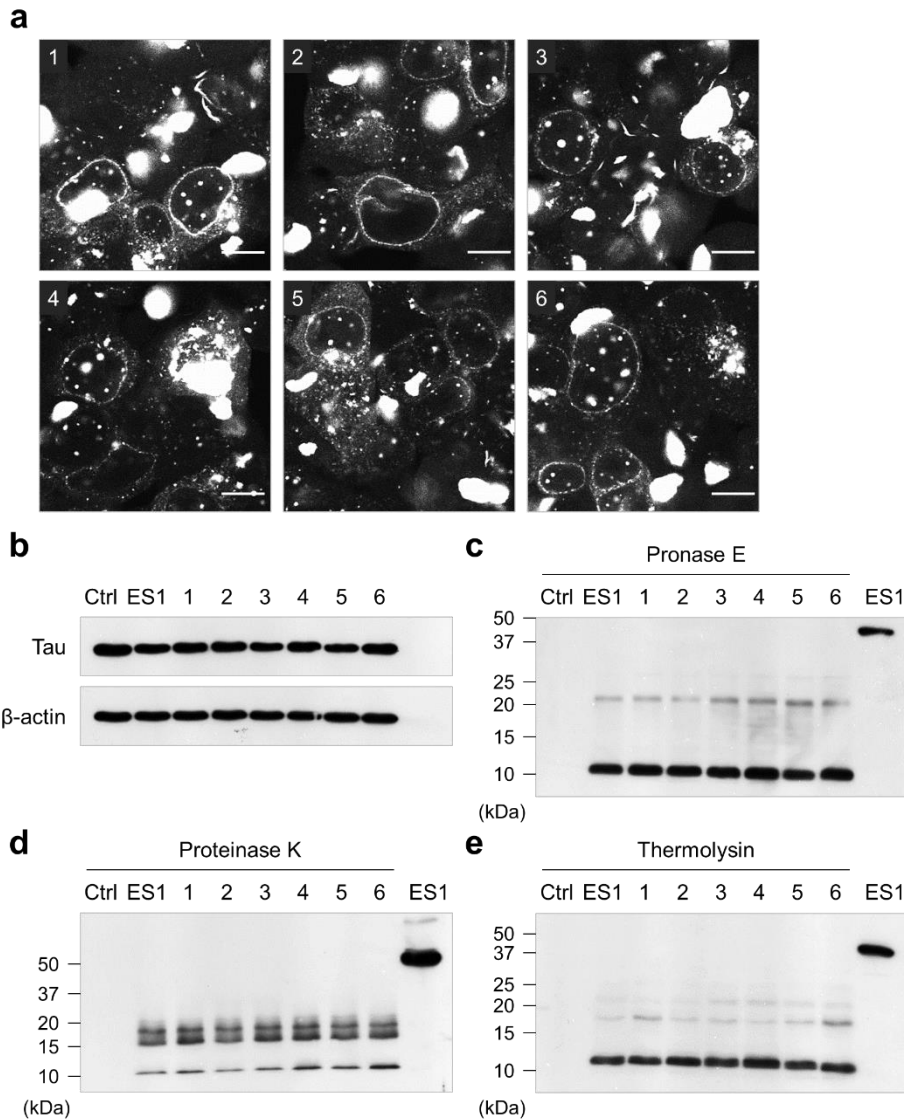

37

38 **Supplementary Figure 3** Heterogeneous tau inclusion morphology and limited proteolytic digestions.

39 **a.** ES1 cells were re-subcloned by limiting dilution to obtain monoclonal cell populations representing each tau  
40 inclusion morphology. All six subclones (1 to 6) showed a heterogeneous phenotype the same as ES1 parental cells  
41 seen in **Figure 2a**. Scale bar, 10  $\mu$ m. **b** to **e.** To differentiate the protected fibrillar cores of tau in individual cells, the  
42 cell lysates (**b**) were digested using pronase E (**c**), proteinase K (**d**), and thermolysin (**e**), and analyzed by western  
43 blot using anti-tau mAbs, ET3 and RD4. The limited proteolytic digestions revealed resistant core peptides in each  
44 subclone (1 to 6) ranging from 10 to 25 kDa in size, while tau species in the reporter controls (Ctrl, 4RD-YFP  
45 P301L/V377M) were completely cleaved. The 10 kDa protease-resistant core appeared in all digestion conditions,

*LLPS of tau disrupts NPC*

46 and one or two bands between 15 to 20 kDa were shown depending on the enzymes tested. The patterns of the  
47 fragmented resistant cores were identical to each other, indicating that ES1 cells as well as the subclones reflect  
48 phenotypically similar monoclonal cell populations. Related to **Figure 3**.

49



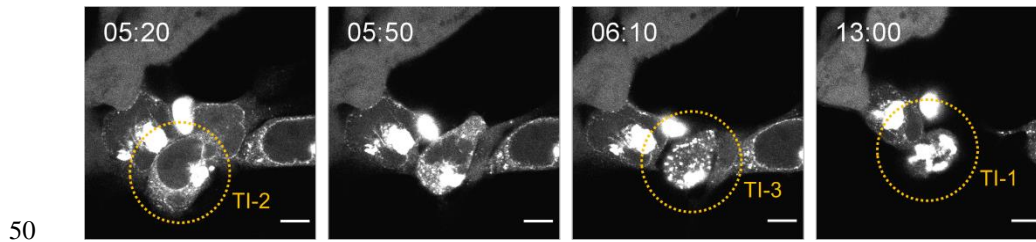

51 **Supplementary Figure 4** Morphological changes in tau inclusions.

52 Live-cell imaging revealed that, in the seeded reporter cells (4RD-YFP P301L/V377M) as per **Figure 2**, TIs  
53 underwent morphological changes. TI-2 morphology (nuclear envelope, NE) was turned into TI-3 (speckles) and  
54 then TI-1 (amorphous). The cells were imaged every 10 min for 16 hours. Scale bar, 10  $\mu$ m. Related to **Figure 3**.

55

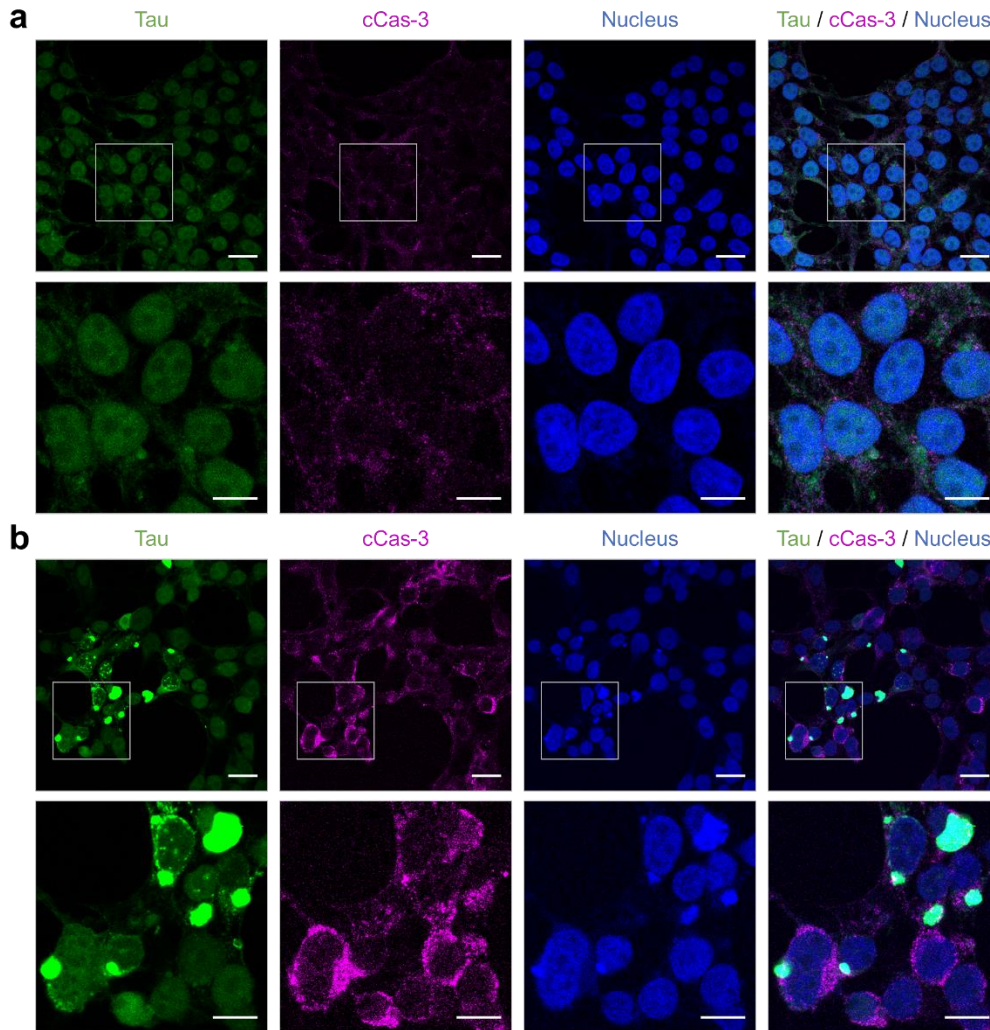

56

57 **Supplementary Figure 5** Increase in the level of cleaved Cas-3 with tau inclusions.

58 Tau reporter cells (4RD-YFP P301L/V377M) were transiently seeded tau and performed immunocytochemistry for  
59 cCas-3 as per **Figure 2** and **Figure 5**. In comparison with control cells seeded with non-Tg brain homogenate (**a**),  
60 the level of cleaved Cas-3 was increased in the tau seeded cells and adjacent cells (**b**). Tau in green; cleaved Cas-3  
61 in magenta; nuclei were counterstained with DAPI (blue). Scale bar, 20  $\mu\text{m}$  and 10  $\mu\text{m}$  in the boxed images. Related  
62 to **Figure 4**.

63

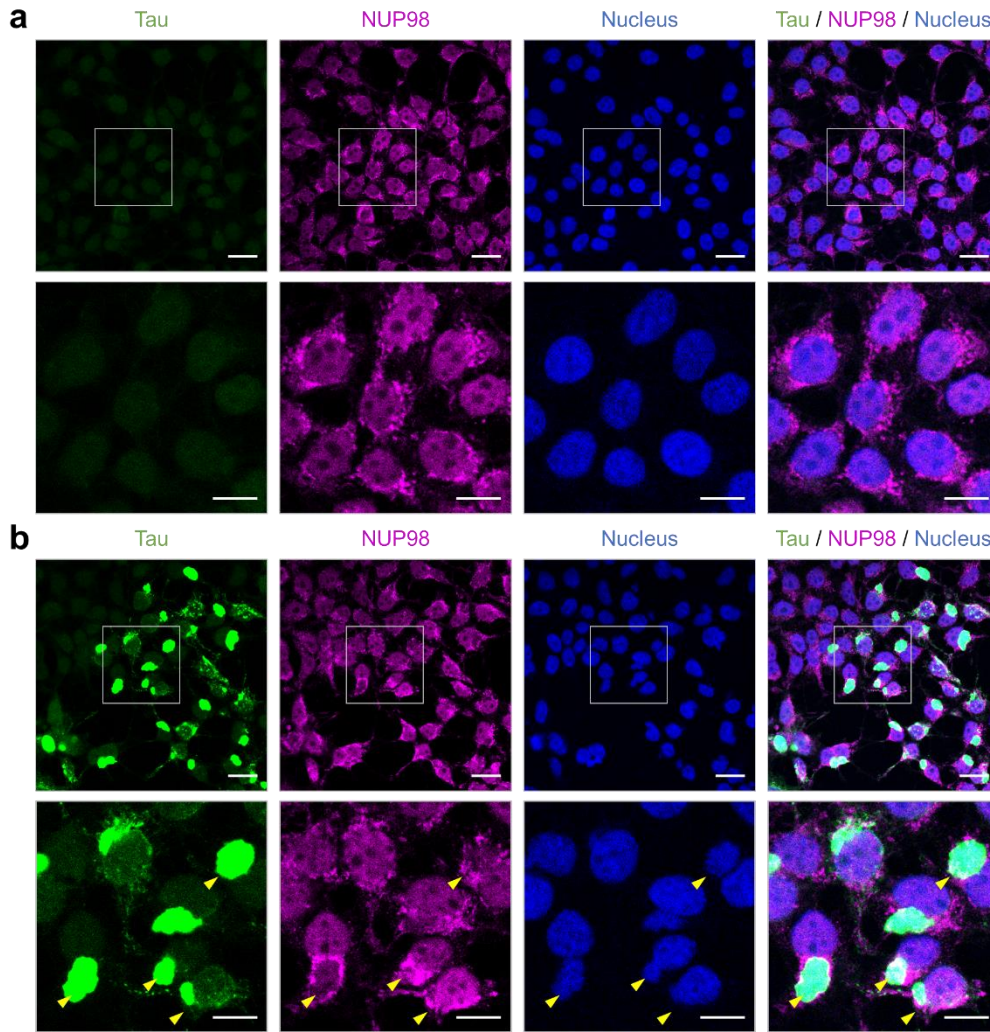

64

65 **Supplementary Figure 6** Mis-localization of NUP98 with tau inclusions.

66 Tau reporter cells (4RD-YFP P301L/V377M) were seeded with tau and imaged as per **Figure 2** and **Figure 5**,  
67 respectively. NUP98 is one of the most abundant nucleoporins and contains Phe and Gly-rich repeats. In comparison  
68 with control cells seeded with non-Tg brain homogenate (**a**), mis-localization of NUP98 signals, which surrounded  
69 tau inclusions, were observed in the seeded cells (**b**). Tau in green; NUP98 in magenta; nuclei were counterstained  
70 with DAPI (blue). Scale bar, 20  $\mu\text{m}$  and 10  $\mu\text{m}$  in the boxed images. Related to **Figure 5**.

71

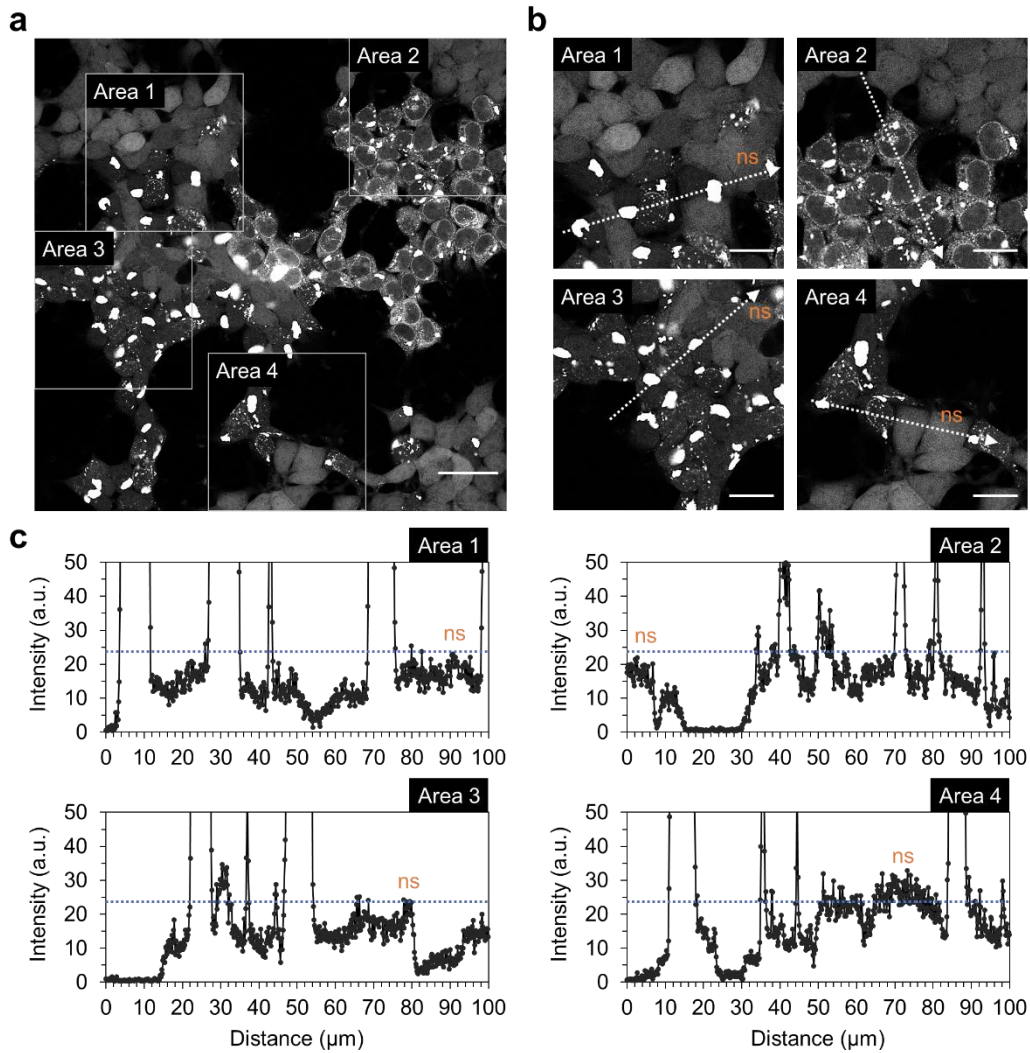

72

73 **Supplementary Figure 7** Condensation of tau-YFP into various inclusion morphologies.

74 **a.** Transiently tau-seeded reporter cells (4RD-YFP P301L/V377M) as per **Figure 2** showed various inclusion  
75 morphologies. **b** and **c.** Plot profiling of the tau inclusions. Intensities of tau-YFP signals were measured from four  
76 different areas across the tau-positive and negative cells along the arrows with a length of 100  $\mu\text{m}$ . a.u., arbitrary  
77 units; ns, non-seeded cells. Scale bar, 40  $\mu\text{m}$  and 20  $\mu\text{m}$  in the boxed images. Related to **Figure 8**.

78



79 **DESCRIPTION OF RELATED MANUSCRIPT FILES**

80

81

82 **Tau conformers in FTLD-MAPT undergo liquid-liquid phase separation and perturb the**  
83 **nuclear envelope**

84

85

86 Sang-Gyun Kang<sup>1</sup>, Zhuang Zhuang Han<sup>1,2</sup>, Nathalie Daude<sup>1</sup>, Emily McNamara<sup>1,2</sup>, Serene Wohlgenuth<sup>1</sup>, Jiri G.  
87 Safar<sup>3</sup>, Sue-Ann Mok<sup>1,2</sup> and David Westaway\*<sup>1,2</sup>

88

89 <sup>1</sup>Centre for Prions and Protein Folding Diseases, University of Alberta, Edmonton, AB Canada. <sup>2</sup>Department of  
90 Biochemistry, University of Alberta, Edmonton, AB, Canada. <sup>3</sup>Department of Neurology and Pathology, Case  
91 Western Reserve University, OH, USA.

92

93

94

95

96 \*Correspondence should be addressed to:

97

98 D. Westaway PhD, Centre for Prions and Protein Folding Diseases, 204 Brain and Aging Research Building,  
99 University of Alberta, Edmonton T6G 2M8, Canada. david.westaway@ualberta.ca

100

101 File Name: **Supplementary Movie 1**

102 Description: Live cell imaging of tau reporter cells (4RD-YFP P301L/V377M) seeded with brain homogenate of  
103 clinically ill TgTau<sup>P301L</sup> with CSA Type 2 profiling. Tau inclusions spread through cell division. Time-lapse movies  
104 were created at 6 days post seeding by recording photographs for 16 hours at one frame every 10 min (1/10  
105 frame/min). Scale bar, 10  $\mu$ m. Related to **Supplementary Figure 2a**.

106

107 File Name: **Supplementary Movie 2**

108 Description: Live cell imaging of the seeded tau reporter cells (4RD-YFP P301L/V377M) as per **Supplementary**  
109 **Movie 1**. Cell-to-cell spread of tau inclusions through membrane nanotubes. Time-lapse movies were created at 6  
110 days post seeding by recording photographs for 16 hours at one frame every 10 min (1/10 frame/min). Scale bar, 10  
111  $\mu$ m. Related to **Figure 2c**.

112

113 File Name: **Supplementary Movie 3**

114 Description: Live cell imaging of the seeded tau reporter cells (4RD-YFP P301L/V377M) as per **Supplementary**  
115 **Movie 1**. Tau inclusions were adsorbed by adjacent cells. Time-lapse movies were created at 6 days post seeding by  
116 recording photographs for 16 hours at one frame every 10 min (1/10 frame/min). Scale bar, 10  $\mu$ m. Related to  
117 **Supplementary Figure 2b**.

118

119 File Name: **Supplementary Movie 4**

120 Description: Live cell imaging of tau reporter cells (4RD-YFP P301L/V377M) as per **Supplementary Movie 1**.  
121 Multinucleated cells emerged by a failure in cell division. Time-lapse movies were created at 6 days post seeding by  
122 recording photographs for 16 hours at one frame every 10 min (1/10 frame/min). Scale bar, 10  $\mu$ m. Related to  
123 **Figure 2d**.

124

125 File Name: **Supplementary Movie 5**

126 Description: Live cell imaging of tau reporter cells (4RD-YFP P301L/V377M) as per **Supplementary Movie 1**. NE  
127 tau inclusions were transformed into speckle and then amorphous shapes. Time-lapse movies were created at 6 days  
128 post seeding by recording photographs for 16 hours at one frame every 10 min (1/10 frame/min). Scale bar, 10  $\mu$ m.  
129 Related to **Supplementary Figure 4**.

130

131 File Name: **Supplementary Movie 6**

132 Description: Live cell imaging of tau reporter cells (Dox:GFP-0N4R P301L) as per **Supplementary Movie 1**. NE  
133 tau inclusions were transformed into amorphous shapes. Time-lapse movies were created at 6 days post seeding by  
134 recording photographs for 16 hours at one frame every 10 min (1/10 frame/min). Scale bar, 10  $\mu$ m. Related to  
135 **Figure 3b**.

136

137 File Name: **Supplementary Movie 7**

138 Description: Live cell imaging of tau reporter cells (4RD-YFP P301L/V377M) as per **Supplementary Movie 1**.  
139 Multinucleated reporter cells containing NE tau inclusions underwent apoptotic cell death. Time-lapse movies were  
140 created at 6 days post seeding by recording photographs for 16 hours at one frame every 10 min (1/10 frame/min).  
141 Scale bar, 10  $\mu$ m. Related to **Figure 4g**.

142

143 File Name: **Supplementary Movie 8**

144 Description: Live cell imaging of tau reporter cells (4RD-YFP P301L/V377M) transiently transfected with NCC  
145 reporter construct. For FRAP analysis, 5 reference photographs were taken at the beginning and RFP were  
146 photobleached. Time-lapse movies were created by recording photographs for 6 hours at one frame every 10 min  
147 (1/10 frame/min). Scale bar, 10  $\mu$ m. Related to **Figure 7b**.

148



149 File Name: **Supplementary Movie 9**

150 Description: Live cell imaging of ES1 cells transiently transfected with NCC reporter construct as per

151 **Supplementary Movie 8**. Time-lapse movies were created by recording photographs for 6 hours at one frame every

152 10 min (1/10 frame/min). Scale bar, 10  $\mu$ m. Related to **Figure 7b**.

153

154 File Name: **Supplementary Movie 10**

155 Description: Live cell imaging of NE tau inclusions in ES1 cells. For FRAP analysis, 5 reference photographs were

156 taken at the beginning and NE tau inclusions were photobleached. Time-lapse movies were created by recording

157 photographs for 30 min at one frame every 30 sec (1/30 frame/sec). Scale bar, 10  $\mu$ m. Related to **Figure 8c** and **8d**.

158

159 File Name: **Supplementary Movie 11**

160 Description: Live cell imaging of multinucleated cells containing NE tau inclusions (ES1 cells). For FRAP analysis,

161 1 reference photograph was taken at the beginning and NE tau inclusions were photobleached. Time-lapse movies

162 were created by recording photographs for 30 min at one frame every 30 sec (1/30 frame/sec). Scale bar, 10  $\mu$ m.

163 Related to **Figure 8e**.
